1 **Kite-shaped molecules block SARS-CoV-2 cell entry at a post-attachment step**

2 **Running title: Repurposing for coronaviruses.**

3 **Shiu-Wan Chan\*, Talha Shafi and Robert C. Ford**

4

5 **Faculty of Biology, Medicine and Health, School of Biological Sciences, The University of**

6 **Manchester, Michael Smith Building, Oxford Road, Manchester M13 9PT, United**

7 **Kingdom**

8

9 **\*correspondence [shiu-wan.chan@manchester.ac.uk](mailto:shiu-wan.chan@manchester.ac.uk)**

10

11 **Keywords: COVID-19, SARS-CoV-2, anti-viral screening, pseudovirus, spike protein,**

12 **virus entry, virus attachment, virus post-attachment, pharmacophore**

13

14

15

16 **ABSTRACT**

17

18 Anti-viral small molecules are currently lacking for treating coronavirus infection. The long  
19 development timescales for such drugs are a major problem, but could be shortened by  
20 repurposing existing drugs. We therefore screened a small library of FDA-approved  
21 compounds for potential severe acute respiratory syndrome coronavirus-2 (SARS-CoV-2)  
22 antivirals using a pseudovirus system that allows a sensitive read-out of infectivity. A group  
23 of structurally-related compounds, showing moderate inhibitory activity with IC<sub>50</sub> values in  
24 the 1-5 $\mu$ M range, were identified. Further studies demonstrated that these ‘kite-shaped’  
25 molecules were surprisingly specific for SARS-CoV and SARS-CoV-2 and that they acted  
26 early in the entry steps of the viral infectious cycle, but did not affect virus attachment to the  
27 cells. Moreover the compounds were able to prevent infection in both kidney- and lung-  
28 derived human cell lines. The structural homology of the hits allowed the production of a  
29 well-defined pharmacophore that was found to be highly accurate in predicting the anti-viral  
30 activity of the compounds in the screen. We discuss the prospects of repurposing these  
31 existing drugs for treating current and future coronavirus outbreaks.

32

33

## 34 INTRODUCTION

35

36 The emergence of the coronavirus disease-2019 (COVID-19) has been a major global  
37 challenge that has led to unprecedented efforts to try to control the virus (1). These measures  
38 range from political and societal changes aimed at limiting virus spread, to attempts at  
39 eradication, as exemplified by vaccination. Whilst the former measures are highly unpopular,  
40 have serious impacts on economic factors and are of limited effectiveness, vaccination has so  
41 far proven to be highly efficient. Nevertheless, vaccine development and vaccination of global  
42 populations are lengthy processes, and new COVID variants may arise over the medium to  
43 long term that could require new vaccine development. This is particularly problematic with  
44 RNA viruses with high mutation rates, especially for vaccines that target the spike protein that  
45 is on the outside of the virion and thus subject to continuous selective pressure (2). For example  
46 the vaccine strain initially observed all over the world was replaced by the D614G spike variant  
47 in February, 2020 (3 months after the pandemic was announced) and other new variants are  
48 sweeping through the world currently (3-5) (6). Hence it seems appropriate to look for further  
49 control measures for the virus (7). Missing from the arsenal of effective measures to date has  
50 been an effective anti-viral therapy that could be administered prior to, or after acquiring the  
51 virus. So far, drug therapy has been limited to attempts to reduce the most life-threatening  
52 symptoms of the infection that arise due to over-stimulation of the immune response (8). We  
53 therefore lack a first line anti-viral defence to add to the current toolkit (9). Such first-line  
54 treatments would allow more time to develop new vaccines, could improve therapeutics and  
55 might be employed as prophylactics in those who cannot be vaccinated or do not respond well  
56 to vaccine. Such drugs, would ideally target conserved steps in the viral life cycle, be broad-  
57 spectrum and therefore generally applicable to COVID variants of the present and future (9).

58

59 The post-attachment entry step is one such conserved step (10). In order to enter host cells to  
60 initiate an infection, the virus must recognize and bind to a host cell receptor which then  
61 triggers virus-host cell membrane fusion to release the viral nucleocapsid into the host cell  
62 cytoplasm (11). Coronavirus spike protein is divided into an S1 attachment subunit and an  
63 S2 fusion subunit (12,13). The S1 subunits of the severe acute respiratory syndrome virus  
64 (SARS-CoV) and SARS-CoV-2 share 75% and 50% identity in the receptor binding domain  
65 (RBD) and the receptor binding motif whereas the more conserved S2 subunits share 88%  
66 and 100% identity in the fusion domain and fusion peptide (14). Receptor recognition is not  
67 conserved in coronaviruses. They use a range of host receptors. SARS-CoV-2 and SARS-  
68 CoV recognize the same receptor, the human angiotensin-converting enzyme 2 (ACE2),  
69 whereas the Middle East respiratory syndrome coronavirus (MERS-CoV) recognizes  
70 dipeptidyl peptidase 4 (DPP4) (12,13) (15) (16) . The fusion mechanism, on the other hand,  
71 involving the formation of a 6-helix bundle, is conserved amongst viruses (10). Cleavage at  
72 S1/S2 and an internal S2' site is a pre-requisite to prime fusion in coronaviruses (12,13,17).  
73 SARS-CoV-2 is unusual in that the S1/S2 boundary harbours a furin cleavage site so the  
74 spike protein is already cleaved in the mature virion (12). Viruses either fuse directly at the  
75 host plasma membrane under physiological pH or fuse at the endosome under acidic pH (10).  
76 Members of the coronavirus family can use either or both pathways (18). There is evidence  
77 to suggest that SARS-CoV-2 uses plasma membrane fusion as the default pathway but can  
78 use endosomal fusion if the plasma membrane protease, TMPRSS2, is not available; hence  
79 the micro-environment is important in dictating the entry pathway (19). However, it has been  
80 found that infection of ACE2-deficient lung cells depends on clathrin-mediated endocytosis  
81 and endosomal cathepsin L, indicating that endosomal fusion may well be the major entry  
82 pathway in a subset of cell types (20). Endosomal fusion is preceded by receptor-mediated  
83 endocytosis and trafficking to an acidic compartment to trigger fusion (10). Clathrin-,

84 caveolae- and lipid-raft-mediated endocytosis have all been implicated in coronavirus  
85 infections (21). In SARS-CoV-2, both clathrin- and lipid-raft-mediated endocytosis have  
86 been demonstrated in two different 293T-ACE2 cell lines; despite somewhat contradictory  
87 results (22) (23). There is evidence that SARS-CoV-2 requires phosphatidylinositol 3-  
88 phosphate 5-kinase to traffick beyond the early endosome to reach the late  
89 endosome/lysosome for cathepsin L-catalysed S2' cleavage to trigger endosomal fusion  
90 (17,23,24). Thus, the post-attachment entry steps depend heavily on a number of host  
91 signalling molecules which are amenable for drug targeting. Targeting conserved viral  
92 and/or host factors/processes negates the problematic drug escape mutants and is a current  
93 trend of generating broad-spectrum anti-virals (25).

94 Our aim is to find drug hits that target the entry steps, in particular the post-attachment step  
95 but any attachment blockers can be useful in virus-specific inhibition or universal synergistic  
96 inhibition with post-attachment inhibitors. Hence we employed a pseudovirus system in  
97 which the mouse leukaemia virus (MLV) is pseudotyped with the SARS-CoV-2 spike protein  
98 that would allow us to specifically screen for entry inhibitors (26) (27). During the current  
99 COVID crisis our first aim was to explore re-purposing of FDA-approved drugs and natural  
100 products, with the longer term goal of using any hits to generate a pharmacophore to inform  
101 next generation drug design.

102

103

## 104 **RESULTS**

105

### 106 **293T-ACE2 is a suitable cell type for pseudovirus drug screening**

107 In order to re-purpose drugs for fast-tracking COVID-19 prophylaxis and treatments, we  
108 undertook screening of two libraries of FDA-approved drugs and natural products from  
109 APExBIO (28) by using MLV pseudotyped with the SARS-CoV-2 S protein (29), with the  
110 goal of targeting the major attachment and entry steps (Fig.1). The spike protein is derived  
111 from the Wuhan-Hu-1 SARS-CoV-2 and has been codon optimized for mammalian  
112 expression (12). To find a suitable human cell type for the screening of drugs inhibiting viral  
113 infectivity we tested SARS-CoV-2-S, SARS-CoV-S, MERS-CoV-S and vesicular stomatitis  
114 virus (VSV)-glycoprotein (G) pseudoviruses against a range of cell types and employing the  
115 pseudovirus-encoded luciferase activity as a read-out for infectivity (Fig.2). As expected, the  
116 control VSV-G pseudovirus, which has a broad host range (29), infected all cell types.  
117 SARS-CoV-S and SARS-CoV-2-S pseudoviruses did not infect the hepatocyte cell line, Huh-  
118 7. The heterogeneity in ACE2 expression in Huh-7 cell populations together with the widely  
119 varied characteristics of different laboratory-passaged Huh-7 lines may explain the  
120 discrepancy in the susceptibility of Huh-7 cells to native SARS-CoV-2 infection (13,30-32).  
121 In contrast, MERS-CoV-S pseudovirus, which preferentially binds DPP4 as a receptor rather  
122 than ACE2 (16), showed a high level of infectivity in Huh-7 cells. The green African  
123 monkey Vero cells (kidney), human colorectal epithelial Caco2 cells and human lung  
124 epithelial Calu3 cells all express a high level of ACE2 and are susceptible to native SARS-  
125 CoV-2 infection (31) but only Vero cells could be infected to a high degree by SARS-CoV-S  
126 and SARS-CoV-2-S pseudoviruses in this study. There was also a high background  
127 luciferase read-out from the empty (bald) pseudovirus in Calu3 cells. The human kidney  
128 epithelial 293T cells and human lung epithelial A549 cells express a low level of native  
129 ACE2 (31). A549 cells stably expressing recombinant human ACE2 showed SARS-CoV-S  
130 and SARS-CoV-2-S pseudovirus infectivity, but not to the same high level as 293T cells,  
131 which were therefore employed for initial drug screening. Compared to 293T cells not

132 overexpressing ACE2, infectivity of SARS-CoV-2-S pseudovirus in 293T-ACE2 cells was  
133 about 100x higher (Fig.3a,d). Quantitation by Western blot estimated the number of ACE2  
134 receptors to be at least ten times higher in 293T-ACE2 cells than in the untransfected 293T  
135 cells with no loss of ACE2 expression in late passaged cells (P16) compared to early  
136 passaged cells (P4) (Fig.3b,d). The number of trimeric spike proteins present on the surface  
137 of the pseudovirus in each infection experiment was also estimated (Fig. 3c,d). The data  
138 imply that the 293T-ACE2 cells' ACE2 receptors will outnumber spike protein in the  
139 pseudovirus infection experiments (Fig.3b,c,d), which is likely to be representative of the *in-*  
140 *vivo* situation, especially at early stages of infection. Furthermore the quantitation confirmed  
141 that the concentrations of proteins in the assays described below were well below the drug  
142 concentrations used. This was important to allow for the possibility of full inhibition by any  
143 given drug that was working by blocking the ACE2-Spike interaction and hence virus  
144 attachment to the cell.

145

#### 146 **Kite-shaped molecules inhibit SARS-CoV-2 pseudovirus infection**

147 An initial screen of a library of 1363 FDA-approved drugs was carried out using the above-  
148 mentioned cell line. The drugs at 10 $\mu$ M were incubated with the cells after dilution of the  
149 drugs into cell growth media from (predominantly) DMSO-solubilised stock solutions or  
150 (occasionally) ethanol-based or water-based stocks. Any cytotoxicity effects of the drugs at  
151 this concentration were controlled for using an XTT cell viability assay. After screening one-  
152 third of the compounds it became apparent that there was a prevalence of inhibitory activity  
153 found within a class of molecules that displayed a similar structure and a shape reminiscent  
154 of a traditional Chinese Kite. These had a well-conserved tri-cyclic core structure (forming  
155 the sail of the kite) and a more variable extension from the central 6- or 7-membered ring

156 (forming the tail of the kite). We, therefore, selected 61 kite-shaped molecules from the two  
157 libraries. Five that were cytotoxic were excluded at this stage; the remaining molecules  
158 showed a range of activity against pseudovirus infectivity. Supplementary Table S1  
159 summarises the experimental data for the kite-shaped molecules.

160

### 161 **Kite-shaped molecules specifically inhibit SARS-CoV-2 pseudovirus infectivity**

162 Because the kite-shaped molecules could potentially inhibit both SARS-CoV-2-specific entry  
163 steps and MLV-mediated post-entry steps or the reporter, we tested the top eight hits against  
164 MLV pseudotyped with SARS-CoV-2-S, SARS-CoV-S, MERS-CoV-S and VSV-G, which  
165 share common MLV post-entry steps but differ in receptor recognition and entry mechanisms  
166 (18,33). We also included the 14<sup>th</sup> ranked hit, trimipramine, because it had previously been  
167 identified as a specific SARS-CoV entry blocker and an inhibitor of SARS-CoV-2 infection  
168 (26). All the selected kite-shaped molecules showed effects similar to those of  
169 hydroxychloroquine, a known blocker of SARS-CoV-2 entry, by specifically inhibiting  
170 infectivity of the SARS-CoV-2-S, SARS-CoV-S, MERS-CoV-S but not VSV-G pseudotyped  
171 viruses, suggesting that the nine kite-shaped molecules target entry steps specific to these  
172 three coronaviruses (Fig.4a). The kite-shaped molecules inhibited SARS-CoV-S and SARS-  
173 CoV- 2-S pseudoviruses equally well and the inhibition was 1.2 to 8-fold higher than that for  
174 MERS-CoV-S pseudovirus, suggesting that they may, in addition, discriminate between  
175 different receptor-mediated pathways for viral entry. Although low levels of inhibition of  
176 VSV-G pseudovirus infectivity were indicated for a few of the nine compounds, this may be  
177 due to some cytotoxicity at 10 $\mu$ M, as suggested by the correlation between % inhibition and  
178 % viability (Fig.4b). Alternatively, it could be due to inhibition of common post-attachment  
179 pathways in late endosome/lysosome. Hydroxychloroquine, a lysosomotropic agent, did not



180 inhibit VSV-G pseudovirus infection, where fusion takes place at the early endosome stage  
181 (17). In contrast, the reverse transcriptase inhibitor, tenofovir disoproxil fumarate,  
182 completely inhibited infection of all pseudoviruses. These results imply that the kite-shaped  
183 molecules target the SARS-CoV-2 entry steps specifically, rather than any post-entry steps  
184 mediated by the MLV or the reporter.

185 Although the A549 cells transfected with ACE2 showed less propensity for infectivity than  
186 the HEK293T cell line (hence noisier luciferase readouts), a test of eight of the above-  
187 mentioned compounds with the A549-ACE2 system also demonstrated good inhibition of  
188 SARS-CoV-2 spike-mediated infectivity (Supplementary Information Fig.S1). Of the tested  
189 kite-shaped compounds, only asenapine failed to prevent infectivity in the A549-  
190 ACE2/pseudovirus system; whilst chlorprothixene, thioridazine and pizotifen malate showed  
191 the strongest inhibitory activity. As expected, tenofovir showed complete inhibition of  
192 infectivity in this lung-derived cell line, although like asenapine, hydroxychloroquine  
193 appeared to lack inhibitory action. Overall these results suggest that both airway and kidney  
194 cells expressing ACE2 can be treated with kite-shaped inhibitors with the proviso that cell-  
195 specificity may be a factor for some of the compounds tested.

196

### 197 **Efficacy of the kite-shaped molecules**

198 To deduce the efficacy of the kite-shaped molecules, we generated dose-response curves  
199 using a range of drug concentrations from 10 $\mu$ M to 0.05 $\mu$ M and using hydroxychloroquine  
200 for comparison (Fig.5a). The kite-shaped molecules displayed IC<sub>50</sub> values from 1.9 $\mu$ M to  
201 4.7 $\mu$ M, compared to 0.7 $\mu$ M for hydroxychloroquine (Fig.5b). All the drugs showed *de*  
202 *minimis* cytotoxicity at 5 $\mu$ M and even at the highest drug concentration employed, the cells  
203 generally displayed a viability above 76% (chlorprothixene and chlorpromazine are

204 exceptions with cell viability at 54% and 68%, respectively (Fig.4b, Fig. 5). Since we diluted  
205 the drugs in cell growth medium, a confounding effect on the determination of IC<sub>50</sub> could be  
206 water solubility of the drugs. Most of the drugs are readily water soluble in their charged  
207 state (pizotifen malate is the exception), but they may partition into the cell membrane via  
208 their uncharged forms which will have very low water solubility (Supplementary Table S2).

209 The similarity in the overall structure of the kite-shaped molecules allowed the generation of  
210 a pharmacophore (Figure 6). Pharmacophores for tricyclic antidepressants (TCAs) have  
211 previously been described, showing the importance of the two outer aromatic rings, one of  
212 which is more hydrophobic. The tail region in the pharmacophore shows H-bonding  
213 propensity and the ability to form a positive charge on an amine group (34) (35). The  
214 pharmacophore generated from the SARS-CoV-2 infectivity assay displayed similar features  
215 to these prior studies (Figure 6a) but with more tightly defined distances and angles between  
216 the three main pharmacophore features. The three-feature minimal model was able to classify  
217 active compounds with predictivity values above 90%. When the complete continuous data  
218 was split into active and non-active compounds based on log activity values, the model still  
219 showed F score values of 70%. The model showed excellent predictive ability with both  
220 training and complete datasets (Figure 6b,c).

221

## 222 **Kite-shaped molecules inhibit pseudovirus entry**

223 To study the mechanisms of inhibition in greater detail, we undertook a time-of-addition  
224 experiment in which drugs were added at different time-points during infection (Fig.7a) with  
225 the hypothesis that the time-point(s) may distinguish different step(s) that may be inhibited  
226 by the drugs. As before, we studied the top nine hits together with trimipramine. The kite-  
227 shaped molecules were able to inhibit infection when added during the entry step (with and

228 without 1h pre-incubation), to similar extents to the full-treatment (Fig.7b). Most of the kite-  
229 shaped molecules did not inhibit infectivity when only added 1 and 2 hours post-infection  
230 (hpi). This observation was similar for the entry blocker, hydroxychloroquine, suggesting  
231 that the kite-shaped molecules are also entry blockers. The exceptions were chlorprothixene  
232 and chlorpromazine, which were still able to reduce infectivity to 45% and 35%, respectively,  
233 when added at 1hpi. However, these reductions in infectivity were still much lower than the  
234 complete inhibition of infectivity observed for the reverse transcriptase inhibitor, tenofovir.  
235 Altogether, these results suggest that the kite-shaped molecules inhibit a SARS-CoV-2-  
236 specific entry step.

237

### 238 **Kite-shaped molecules inhibit a post-attachment step**

239 To further delineate the entry step that is inhibited by the kite-shaped molecules, we  
240 undertook temperature shift experiments to distinguish between attachment and post-  
241 attachment steps that were assumed to proceed (virus attachment) - or not proceed (virus  
242 entry, post attachment) - at the low temperature (4°C) employed in the first experiment  
243 (Fig.8a). With this assay, hydroxychloroquine did not inhibit attachment, in agreement with  
244 its main role as a post-attachment entry blocker (Fig.8b). Most of the kite-shaped molecules  
245 reduced infectivity to 48-71% at the attachment step apart from chlorprothixene which did  
246 not inhibit virus attachment. Thioridazine reduced infectivity to 28% in the attachment assay.  
247 These data suggest that all the kite-shaped molecules may reduce attachment to some extent,  
248 although it should be acknowledged that this interpretation of the data depends on complete  
249 removal of the added drugs at the wash step, which may be dependent on water solubility at  
250 4°C (Supplementary TableS 2). Overall, the data suggest that the kite-shaped molecules only  
251 modestly inhibit attachment of virus to target cells. In contrast, the kite-shaped molecules

252 significantly reduced infectivity under conditions permissive for the post-attachment, entry  
253 step (Fig. 8b), and to levels similar to that of the post-attachment entry blocker control,  
254 hydroxychloroquine, suggesting that the kite-shaped molecules are mainly targeting post-  
255 attachment entry. These experiments suggest that the kite-shaped molecules are mainly post-  
256 attachment entry blockers although some attachment blocking activity cannot be ruled out  
257 completely with the current assays employed.

258

### 259 **Asenapine and hydroxychloroquine show additive, but not synergistic effects on SARS-** 260 **CoV-2 pseudovirus infection**

261 We tested whether asenapine (IC<sub>50</sub> 1.4μM) and hydroxychloroquine (IC<sub>50</sub> 0.7μM) had  
262 synergistic actions in inhibiting SARS-CoV-2 infectivity by measuring the dose-response  
263 behaviour in the assay using a matrix of concentrations of the two drugs. There was no clear  
264 indication of any synergistic effects; rather the data implied that the two drugs had additive  
265 effects on viral infectivity at low concentrations (Supplementary Information Fig.S2). These  
266 data are consistent with the ideas discussed above, that the kite-shaped drugs and  
267 hydroxychloroquine both act at the entry steps of the pseudovirus.

268

## 269 **DISCUSSION**

270

271 Using an MLV backbone pseudotyped with SARS-CoV-2-S we have successfully identified  
272 a class of kite-shaped molecules of TCAs with anti-viral activity and IC<sub>50</sub> in the μM range.  
273 Chlorprothixene, one of the top hits in this study, was identified in a repurposing study  
274 screening 8,810 drugs that were either FDA-approved or investigational (36).

275 Methotrimeprazine and piperacetazine also emerged as top hits from that study, and these two  
276 compounds share the basic kite-shaped structure of the TCAs. Evidence from observations of  
277 patient populations has suggested there was a lower incidence of symptomatic and severe  
278 SARS-CoV-2 problems in psychiatric patients (37), and this report was followed up with an  
279 *in-vitro* demonstration of the anti-SARS-CoV-2 activity of chlorpromazine (38). Our top 14<sup>th</sup>  
280 hit, trimipramine, has also been identified to cross-inhibit native SARS-CoV-2 infection of  
281 Vero E6 in an anti-viral screen using SARS-CoV-S pseudotyped viruses (26). Our top 5<sup>th</sup> hit,  
282 chlorpromazine, has been shown to inhibit infectivity of SARS-CoV-2 in Vero E6 and A549-  
283 ACE2 cells and has entered into a clinical trial in France (37,38). Some of our top hits,  
284 chlorprothixene, asenapine, thioridazine, amitriptyline, maprotiline, imipramine have been  
285 shown to inhibit native SARS-CoV-2 infection, altogether showing the robustness of our  
286 pseudotyped system in quantitative, anti-viral drug screening (36) (39) (40) (41).

287

288 Many of the kite-shaped molecules selected are TCAs, bind to brain-located receptors and are  
289 currently used to treat neurological problems (42). The  $IC_{50}$  values reported in Figure 5 may  
290 be considered modest by modern criteria (43); for example, peak serum concentrations  
291 ( $C_{max}$ ) of the selected drugs within current drug treatment regimes as listed in PubChem  
292 database are in the region of 5nM to 1-2 $\mu$ M, with the highest  $C_{max}$  values being for  
293 chlorprothixene (1.4 $\mu$ M). Large variability in  $C_{max}$  may also arise from differences in drug  
294 metabolism and clearance within patient populations (44). For comparison,  
295 hydroxychloroquine, which is employed as an anti-malarial and in immunosuppression  
296 reaches  $C_{max}$  values of around 0.4 $\mu$ M but has so far failed to fulfil early promise as a SARS-  
297 CoV-2 antiviral (45).

298 TCAs are known to bind to their neurotransmitter receptors in deep binding pockets within  
299 their transmembrane domains composed of 7 transmembrane helices, as exemplified in the  
300 3D structures of drug/receptor complexes (4M48 – nortriptyline/D2 dopamine receptor (46);  
301 3RZE – doxepin/H1 histamine receptor (47)). For the serotonin transporter, a similar binding  
302 site exists for citalopram (5I74) (48), a drug that lacks the central cyclic ring of the TCAs,  
303 but is otherwise very similar in its 3D structure to the kite-shaped molecules in its binding  
304 mode. A different binding site exists at an allosteric site in the pentameric Cys-loop receptor  
305 which can bind chlorpromazine (5LG3) (49). Similarly, the binding of amitriptyline to poly  
306 (ADP-ribose) polymerase-1 (PARP1) displays an entirely different binding site (50). Low  
307 affinity binding of clomipramine, thioridazine and imipramine to the Ebola virus glycoprotein  
308 has also been reported, and these compounds were also shown to reduce infectivity of a  
309 pseudotyped virus system with IC<sub>50</sub> values in the 8-13µM range (51). The binding site for  
310 these compounds does not have an equivalent in the SARS-CoV-2 spike protein, however  
311 Ebola virus and SARS-CoV-2 may share a similar entry route into the cell (52). Hence, none  
312 of these structural studies provided clear clues as to the likely protein target of the kite-  
313 shaped drugs for inhibition of SARS-CoV-2 infectivity, but they do demonstrate that they  
314 can bind to a variety of targets.

315 Perhaps of greater significance is that TCAs and similar drugs can bind and inhibit the  
316 SLC6a19 amino acid transporter (53) that is highly expressed in the intestines and kidneys  
317 (54). The structure of LeuT, a bacterial homolog of SLC6a19 and other transporters in the  
318 SLC6a grouping has been studied in the presence of diverse tricyclic and similar  
319 antidepressants including clomipramine and nortriptyline (PDBIDs 4MMA, 4M48), revealing  
320 the nature of inhibition and the binding site (55). SLC6a19 is known to form a stable complex  
321 with the ACE2 receptor and the SARS-CoV-2 RBD (PDBID 6M17, see also 6M18, 6M1D)  
322 (56), and residues involved in binding drugs in LeuT are conserved in the human SLC6a19

323 protein. Docking of clomipramine, amitriptyline, and the pharmacophore model shown in  
324 Figure 6, into the SLC6a19 atomic model was possible (Supplementary Information Figure  
325 S3) and this highlighted aromatic residues and H-bond acceptors that may be involved in the  
326 binding of the inhibitory TCAs.

327 Hence one could hypothesise that the kite-shaped molecules are affecting SARS-CoV-2  
328 infectivity in ACE2-overexpressing kidney cells at an early stage in the viral lifecycle,  
329 possibly by modifying the behaviour of the RBD/ACE2/SLC6a19 complex. Nevertheless,  
330 there are conceptual problems for any SLC6a19-based strategy aimed at reducing SARS-  
331 CoV-2 infectivity in the lungs: ACE2 is highly expressed in airway cells but SLC6a19 is not.  
332 Airway-expressed homologs of SLC6a19, such as SLC6a14, SLC6a15 and SLC6a20 may be  
333 considered as possible replacements for SLC6a19 in the lungs. However for these proteins  
334 there is currently no evidence for any direct interaction with ACE2. One of the candidates,  
335 SLC6a15, has been reported to interact directly with several SARS-Cov-2 proteins including  
336 the M membrane glycoprotein (57,58), and like ACE2, it appears to carry a C-terminal PDZ-  
337 binding motif which therefore offers a potential route for an interaction bridged by an  
338 unknown PDZ protein. If SLC6a19 is being replaced by a homolog in the airways, then it  
339 could be argued that the most likely candidate is SLC6a15.

340 The above hypothesis is supported by our time-of-addition and temperature shift experiments,  
341 which have identified post-attachment as the main target with some inhibition of attachment  
342 step. Moreover, the ability of the kite-shaped molecules to inhibit SARS-CoV-S, SARS-  
343 CoV-2-S and MERS-CoV-S pseudoviruses with a preferential inhibition for the two SARS-  
344 CoV-S pseudoviruses, suggests that they target a pathway shared by the three viruses but  
345 may, in addition, discriminate between different receptor-mediated pathways for viral entry.

346 Although the kite-shaped molecules generally share a common mode of action, they may also  
347 possess unique mechanisms of inhibition. Whereas most of the kite-shaped molecules  
348 displayed a similar inhibitory pattern of infectivity, chlorprothixene and chlorpromazine  
349 showed some discrepancies. Both inhibited the VSV-G pseudovirus to a greater extent than  
350 the other drug hits. Both showed some degree of inhibition when added at 1hpi and 2hpi.  
351 Whereas all the other kite-shaped molecules displayed some degree of inhibition of  
352 attachment, chlorprothixene did not inhibit attachment. Although some of these  
353 discrepancies could be accounted for by the relative toxicity of these two drugs, off-target  
354 effects and water insolubility of chlorprothixene, we cannot exclude the possibility that they  
355 are results of possession of unique targets. Chlorpromazine has been known to inhibit  
356 clathrin-mediated endocytosis, which is utilized by the VSV to enter cells, so it is not  
357 surprising that it will inhibit VSV-G pseudovirus infection to some extent (59) (60).  
358 Imipramine, a parent compound of trimipramine, blocks macropinocytosis-a potential route  
359 of viral endocytosis although activity has not been demonstrated in SARS-CoV-2 infection  
360 (61). In an anti-viral screen using native SARS-CoV-2, chlorpromazine was added 2h before  
361 infection and after infection but was absent during infection, suggesting that chlorpromazine  
362 may inhibit SARS-CoV-2 infection by targeting host pathways, placing it in a class of host-  
363 targeting agent (38). Three of our top hits, amitriptyline, maprotiline and imipramine have  
364 been shown to prevent SARS-CoV-2 infection by inhibiting acid sphingomyelinase, placing  
365 them in a class of host-targeting agents (40). We currently do not have enough evidence to  
366 propose whether our kite-shaped drug hits are direct-acting antivirals and/or host-targeting  
367 agents. Further work will be required to identify the common and unique modes of action of  
368 our drug hits in order to facilitate the formulation of a drug cocktail.

369 Although it is well recognized that SARS-CoV-2 infects lungs, gut and eyes, increasing  
370 evidence suggest liver and kidney tropism with kidney predicted to be the most susceptible



371 (62). Hence, the kidney cell line we used in this study is relevant to SARS-CoV-2 infection  
372 biology. 293T cells are devoid of TMPRSS2, hence unable to trigger plasma membrane  
373 fusion (19). The TMPRSS2 status of A549 cells is unclear with expression detected in some  
374 studies but not others (63) (64). However, the A549-ACE2 cells we used in this study are  
375 devoid of TMPRSS2 (65). As a result, our anti-viral screening is limited to drug hits that  
376 inhibit the endosomal entry pathway. Most viruses employ either the plasma membrane  
377 fusion or the endosomal fusion pathway to enter cells (10). SARS-CoV-2 is peculiar in that it  
378 can employ either pathway (19). SARS-CoV-2 enters cells by fusion at the plasma  
379 membrane when the membrane protease, TMPRSS2, is available. In the absence of  
380 TMPRSS2, SARS-CoV-2 has the flexibility to switch to endosomal entry pathway.  
381 Endosomal fusion is the major entry pathway for SARS-CoV-2 in ACE2-deficient cells (20).  
382 It is, therefore, of paramount importance for an anti-viral regime to be able to target both  
383 pathways. Selective targeting of the default membrane fusion pathway may drive the  
384 evolution of SARS-CoV-2 into the embrace of the endosomal fusion pathway.

385

386 In conclusion, our study has generated a class of kite-shaped molecules that target a  
387 potentially conserved post-attachment step of SARS-CoV-2 cell entry which could inform  
388 clinical trials in the current crisis. We have also created a pharmacophore that will allow for  
389 improvement in drug design as a broad-spectrum antiviral for future pandemics. There have  
390 been four influenza pandemics in 100 years (66). The occurrence of pandemics/outbreaks  
391 has clustered in the last ~20 years, including the 1997 Hong Kong bird flu scare, 2003 SARS  
392 outbreak, 2009 swine flu, 2014 Ebola outbreak, the 2016 Zika global health concern and now  
393 the COVID-19 pandemic (67) (68) (69) (70) (66) (1). In 17 years we have had three deadly  
394 coronavirus outbreaks: SARS-CoV (2002-2003), MERS-CoV (2012-2013; ongoing sporadic)  
395 and SARS-CoV-2 (2019 to date) (71). Reports of new coronaviruses jumping into humans

396 are emerging (72). Predictions of SARS-like outbreaks every 5-10 years seem reasonable  
397 and drugs are needed to stop the current economic chaos being repeated. Currently we are  
398 responding to, rather than preparing for a pandemic. We need a first line anti-viral defence to  
399 reduce the impact of new coronavirus variants while a vaccine is developed. This drug, or  
400 class of drugs, would target conserved steps in the viral life cycle and be broad-spectrum and  
401 generally applicable to COVID variants of the current and next pandemics.

402

## 403 **EXPERIMENTAL PROCEDURES**

### 404 **Cells**

405 293T, 293T-ACE2, A549-ACE2, Caco2, Huh-7 and Vero cells were cultured in Dulbecco's  
406 modified Eagle's medium with 4mM glutamate (DMEM; Sigma) and supplemented with 10%  
407 fetal calf serum (FCS; Sigma), 100 units/ml penicillin and 100µg/ml streptomycin (Sigma) at  
408 37°C, 5% CO<sub>2</sub>. The culture medium of A549-ACE2 was supplemented with 1µg/ml  
409 puromycin (Sigma). The culture medium of Caco2 and Huh-7 was supplemented with 1x non-  
410 essential amino acid. Calu3 cells were cultured in Minimal Essential medium supplemented  
411 with 2mM glutamate.

### 412 **Pseudovirus system**

413 293T cells seeded at  $4 \times 10^6$  per 100mm dish were co-transfected with 6µg of a plasmid  
414 encoding MLV gag-pol, 8µg of the transfer vector encoding a luciferase reporter and 6µg of a  
415 plasmid encoding an empty vector, a viral envelope glycoprotein SARS-CoV-S, SARS-CoV-  
416 2-S, MERS-CoV-S or VSV- G using calcium phosphate (125mM CaCl<sub>2</sub>, 0.7mM Na<sub>2</sub>HPO<sub>4</sub>,  
417 70mM sodium chloride, 25mM Hepes pH 7.05) (see Fig.1). The medium was replaced with  
418 fresh medium after 24h and supernatant containing pseudoviruses was harvested after 48h,

419 clarified by centrifugation at 1000rpm/4°C for 10min, filtered through 0.45µm filter and  
420 stored at -80°C. The resulting pseudovirus contains an MLV gag-pol backbone packaging a  
421 luciferase reporter genome and displaying one of the viral envelope glycoproteins. The MLV  
422 pseudotyped with an empty vector is bald.

### 423 **Anti-viral drug screening**

424 Two libraries from APExBIO containing 1363 FDA-approved drugs (cat:L1021) and 137  
425 natural compounds (cat:L1039) were used in screening. Drug stocks at 10µM were diluted  
426 into 1µM in their own solvents or diluted directly into medium to 20µM. 293T-ACE2 cells  
427 seeded at 25,000 cells per well of 96-well plates were pre-treated with 10µM of individual  
428 drugs, in duplicate, for 1h. After 1h, 25µl of pseudovirus was added together with drugs to  
429 maintain the final drug concentration at 10µM. A parallel set of 96-well plates were set up  
430 with only drugs without pseudovirus, in duplicate, to test for drug cytotoxicity. After  
431 incubation for 37°C, 5%CO<sub>2</sub> for 48h, they were tested for luciferase activity for % infectivity  
432 relative to the infected, solvent controls and for % viability relative to the solvent controls.  
433 For the generation of concentration curves, serial dilutions of drugs were titred, in duplicates  
434 and IC<sub>50</sub> was calculated using Prism9 (GraphPad).

### 435 **Luciferase assay**

436 Cells were lysed by the addition of 100µl of passive lysis buffer (Promega) to each well and  
437 shaken for >15min. Luciferase assay was carried out as described in (73,74) (75) in a buffer  
438 containing 0.0165 M glycylglycine, 0.01 M MgSO<sub>4</sub>, 2.65 mM EGTA, 10.5 mM potassium  
439 phosphate, 1.4 mM adenosine 5'-triphosphate, 0.86 mM dithiothreitol (DTT), 0.175 mg/ml  
440 bovine serum albumin, and 0.035 mM luciferin (Promega) using 50µl of the lysate and a  
441 luminometer (Berthold Technologies, Germany).

442 **XTT viability assay**

443 Cell viability was measured by addition of 50 $\mu$ l of 1mg/ml 2,3-Bis- (2-Methoxy-4-nitro-5-  
444 sulfophenyl)-2H-tetrazolium-5-carboxanilide, disodium salt (XTT, Biotium) and 20 $\mu$ M N-  
445 methyl dibenzopyrazine methyl sulfate (Cayman) in culture medium to each well for 2-4h at  
446 37°C/5% CO<sub>2</sub>. Absorbance was read at 450nm with a reference wavelength of 650nm using a  
447 plate reader (Bio-Tek Synergy HT).

448 **Time-of-addition experiment**

449 In time-of-addition experiment, drugs were added at different times of infection (see Fig.7a).  
450 25 $\mu$ l of pseudovirus were added to each well for 1h, then washed off with 2x PBS. Inhibition  
451 of the entry steps was assayed by the addition of drugs during the 1h infection with and  
452 without an 1h pre-treatment. Drugs were washed off together with the virus at 1hpi and  
453 incubation continued until 48hpi in the absence of drugs. Inhibition of post-entry steps  
454 involved no drug pre-treatment and infection in the absence of drug. After washing off the  
455 virus at 1hpi, drugs were added immediately or at 2hpi and were present for the duration of  
456 the rest of the 48h infection. A full-time treatment was included as a control in which drugs  
457 were added 1h pre-infection and during infection. After washing off the drugs and viruses at  
458 1hpi, fresh drugs were added until 48hpi.

459 **Temperature shift experiment**

460 Cells seeded on 96-well plates were pre-cooled on ice for 1h (see Fig.8a). For the attachment  
461 assay, drugs were diluted into pre-cooled viruses on ice to 10 $\mu$ M just before infection and the  
462 100 $\mu$ l virus-drug mix was added to each well for 1h. After 1h, the wells were washed 3x  
463 with ice-cold medium. Warm medium was added and incubation continued at 37°C/5%CO<sub>2</sub>  
464 until 48hpi. For the penetration (post-attachment) assay, 100 $\mu$ l of pre-cooled virus without

465 drugs were added to each well for 1h infection. After 1h, the wells were washed 3x with ice-  
466 cold medium. Drugs diluted in warm medium were added and incubate at 37°C, 5%CO<sub>2</sub> for  
467 1h. After 1h, the drugs were washed off with 1x warm PBS (without Mg<sup>2+</sup>, Ca<sup>2+</sup>) and 1x with  
468 warm medium. Fresh, warm medium was added and incubation continue at 37°C, 5%CO<sub>2</sub>  
469 until 48hpi.

## 470 **Western blotting**

471 Western blotting was performed as described (73,74,76-78). Protein lysates were harvested  
472 into radioimmunoprecipitation assay buffer (RIPA) buffer (50mM Tris pH8.0, 150mM NaCl,  
473 1% NP40, 0.5% Na deoxycholate, 0.1% SDS) plus protease (Sigma) and phosphatase inhibitors  
474 (APExBIO). Proteins from equal number of cells were separated on TGX Stain-Free SDS-  
475 PAGE gel (Bio-Rad), transferred to polyvinylidene difluoride membrnaes (Millipore), blocked  
476 in 5% semi-skimmed milk (Marvel) in 0.1% Tween 20 (Sigma)/TBS (50mM Tris pH 7.4,  
477 150mM NaCl) before being probed against primary and horseradish peroxidase (HRP)-  
478 conjugated secondary antibodies in blocking buffer. Anti-ACE2 antibody (Proteintech) was  
479 used at 1:2000 and anti-mouse HRP (Cell Signaling Technology) at 1:1000. Anti-SARS-CoV-  
480 2 spike antibody (BEI Resources NR-52947) was used at 1:1000 and anti-rabbit HRP (Cell  
481 Signaling Technology) at 1:1000. Protein bands were detected using Clarity<sup>TM</sup> ECL substrate  
482 (Bio-Rad). Images were captured and quantified using ChemiDoc<sup>TM</sup> XRS+ system (Bio-Rad)  
483 and ImageLab 6.0.1 software (Bio-Rad).

484

## 485 **Pharmacophore & Docking Studies**

486 A pharmacophore was built using the pharmacophore query module implemented in Molecular  
487 Operating Environment (MOE) (79). In brief, Compounds within 0.5 log fold activity of the  
488 highest inhibitory activity were considered active whereas compounds yielding infectivity

489 ranging above 100% infectivity (control) values were considered inactive. These compounds  
490 were stochastically searched for conformers using default parameters and packed as a known  
491 dataset during pharmacophore development. Docked conformations of asenapine due to its  
492 fused ring rigid structure were considered as templates for pharmacophore development. The  
493 pharmacophoric features were calculated using AutoPH4 script (80) with holo conditions, and  
494 manually optimized for maximum performance. The final model was used on the complete  
495 drug dataset to access the screening performance.

496 Docking studies were performed using GOLD software version 2020.3.0 (81). In summary, 2D  
497 depicted structures of compounds were extracted from the PubChem database (82) and were  
498 compiled in a MOE database. The dataset was washed for adjuvant atoms and protonated at  
499 pH 7.4. Partial charges were computed using MMFF94x methods as implemented in MOE  
500 (79). The charge calculated ligands were energy minimized for relaxed three-dimensional  
501 conformations. The LeuBAT structure with clomipramine (4MMD) (83) and the SLC6a19  
502 structure (6M18) (84) were downloaded from the PDB database. The structural discrepancies  
503 in the models were corrected using the structure correction module implemented in MOE. The  
504 corrected structures were protonated, energy minimized and saved for docking simulations.  
505 Both protein and ligands were considered flexible during the simulations. To explore diversity  
506 of conformational solutions, a 15Å area around the ligand binding site was selected.  
507 Furthermore, the cavity was strictly restricted to solvent accessible area using LIGSITE  
508 implemented in GOLD. To ensure reproducibility a total of 100 conformations were generated  
509 and ranked according to the scoring function.

510

511

512

513

514

515 **Statistical analysis**

516 Statistical analysis was performed and graphs were plotted using Prism 9.0 (GraphPad).

517 Shapiro-Wilk normality test and one sample t-test were used for the analysis of temperature

518 shift data against a theoretical mean of 100. A p value of <0.05 was considered statistically

519 significant.

520 Data availability: The pharmacophore and docking results may be obtained from the

521 corresponding author. The authors declare that they have no conflicts of interest with the

522 contents of this article

523

524 *This article contains Supporting Information.*

525

526 **REFERENCES**

527

- 528 1. Huang, C., Wang, Y., Li, X., Ren, L., Zhao, J., Hu, Y., Zhang, L., Fan, G., Xu, J., Gu, X., Cheng, Z.,  
529 Yu, T., Xia, J., Wei, Y., Wu, W., Xie, X., Yin, W., Li, H., Liu, M., Xiao, Y., Gao, H., Guo, L., Xie, J.,  
530 Wang, G., Jiang, R., Gao, Z., Jin, Q., Wang, J., and Cao, B. (2020) Clinical features of patients  
531 infected with 2019 novel coronavirus in Wuhan, China. *Lancet* **395**, 497-506
- 532 2. Sanjuán, R., and Domingo-Calap, P. (2016) Mechanisms of viral mutation. *Cell Mol Life Sci* **73**,  
533 4433-4448
- 534 3. Guan, Q., Sadykov, M., Mfarrej, S., Hala, S., Naeem, R., Nugmanova, R., Al-Omari, A., Salih, S.,  
535 Mutair, A. A., Carr, M. J., Hall, W. W., Arold, S. T., and Pain, A. (2020) A genetic barcode of  
536 SARS-CoV-2 for monitoring global distribution of different clades during the COVID-19  
537 pandemic. *Int J Infect Dis* **100**, 216-223
- 538 4. Callaway, E. (2021) Fast-spreading COVID variant can elude immune responses. *Nature* **589**,  
539 500-501
- 540 5. Tang, J. W., Tambyah, P. A., and Hui, D. S. (2021) Emergence of a new SARS-CoV-2 variant in  
541 the UK. *J Infect* **82**, e27-e28
- 542 6. van Oosterhout, C., Hall, N., Ly, H., and Tyler, K. M. (2021) COVID-19 evolution during the  
543 pandemic - Implications of new SARS-CoV-2 variants on disease control and public health  
544 policies. *Virulence* **12**, 507-508
- 545 7. Forni, G., and Mantovani, A. (2021) COVID-19 vaccines: where we stand and challenges  
546 ahead. *Cell Death Differ* **28**, 626-639
- 547 8. Berlin, D. A., Gulick, R. M., and Martinez, F. J. (2020) Severe Covid-19. *N Engl J Med* **383**,  
548 2451-2460
- 549 9. Li, X., and Peng, T. (2021) Strategy, Progress, and Challenges of Drug Repurposing for  
550 Efficient Antiviral Discovery. *Front Pharmacol* **12**, 660710
- 551 10. Eckert, D. M., and Kim, P. S. (2001) Mechanisms of viral membrane fusion and its inhibition.  
552 *Annu Rev Biochem* **70**, 777-810
- 553 11. Mercer, J., Lee, J. E., Sapphire, E. O., and Freeman, S. A. (2020) SnapShot: Enveloped Virus  
554 Entry. *Cell* **182**, 786-786.e781
- 555 12. Walls, A. C., Park, Y. J., Tortorici, M. A., Wall, A., McGuire, A. T., and Velesler, D. (2020)  
556 Structure, Function, and Antigenicity of the SARS-CoV-2 Spike Glycoprotein. *Cell* **181**, 281-  
557 292.e286
- 558 13. Hoffmann, M., Kleine-Weber, H., Schroeder, S., Krüger, N., Herrler, T., Erichsen, S.,  
559 Schiergens, T. S., Herrler, G., Wu, N. H., Nitsche, A., Müller, M. A., Drosten, C., and  
560 Pöhlmann, S. (2020) SARS-CoV-2 Cell Entry Depends on ACE2 and TMPRSS2 and Is Blocked  
561 by a Clinically Proven Protease Inhibitor. *Cell* **181**, 271-280.e278
- 562 14. Chan, S. W. (2020) Current and Future Direct-Acting Antivirals Against COVID-19. *Front*  
563 *Microbiol* **11**, 587944
- 564 15. Li, W., Moore, M. J., Vasilieva, N., Sui, J., Wong, S. K., Berne, M. A., Somasundaran, M.,  
565 Sullivan, J. L., Luzuriaga, K., Greenough, T. C., Choe, H., and Farzan, M. (2003) Angiotensin-  
566 converting enzyme 2 is a functional receptor for the SARS coronavirus. *Nature* **426**, 450-454
- 567 16. Raj, V. S., Mou, H., Smits, S. L., Dekkers, D. H., Müller, M. A., Dijkman, R., Muth, D.,  
568 Demmers, J. A., Zaki, A., Fouchier, R. A., Thiel, V., Drosten, C., Rottier, P. J., Osterhaus, A. D.,  
569 Bosch, B. J., and Haagmans, B. L. (2013) Dipeptidyl peptidase 4 is a functional receptor for  
570 the emerging human coronavirus-EMC. *Nature* **495**, 251-254
- 571 17. Ou, X., Liu, Y., Lei, X., Li, P., Mi, D., Ren, L., Guo, L., Guo, R., Chen, T., Hu, J., Xiang, Z., Mu, Z.,  
572 Chen, X., Chen, J., Hu, K., Jin, Q., Wang, J., and Qian, Z. (2020) Characterization of spike



- 573 glycoprotein of SARS-CoV-2 on virus entry and its immune cross-reactivity with SARS-CoV.  
574 *Nat Commun* **11**, 1620
- 575 18. Belouzard, S., Millet, J. K., Licitra, B. N., and Whittaker, G. R. (2012) Mechanisms of  
576 coronavirus cell entry mediated by the viral spike protein. *Viruses* **4**, 1011-1033
- 577 19. Ou, T., Mou, H., Zhang, L., Ojha, A., Choe, H., and Farzan, M. (2021) Hydroxychloroquine-  
578 mediated inhibition of SARS-CoV-2 entry is attenuated by TMPRSS2. *PLoS Pathog* **17**,  
579 e1009212
- 580 20. Puray-Chavez, M., LaPak, K. M., Schrank, T. P., Elliott, J. L., Bhatt, D. P., Agajanian, M. J.,  
581 Jasuja, R., Lawson, D. Q., Davis, K., Rothlauf, P. W., Jo, H., Lee, N., Tenneti, K., Eschbach, J. E.,  
582 Mugisha, C. S., Vuong, H. R., Bailey, A. L., Hayes, D. N., Whelan, S. P. J., Horani, A., Brody, S.  
583 L., Goldfarb, D., Major, M. B., and Kutluay, S. B. (2021) Systematic analysis of SARS-CoV-2  
584 infection of an ACE2-negative human airway cell. *bioRxiv*
- 585 21. Glebov, O. O. (2020) Understanding SARS-CoV-2 endocytosis for COVID-19 drug repurposing.  
586 *Febs j* **287**, 3664-3671
- 587 22. Li, X., Zhu, W., Fan, M., Zhang, J., Peng, Y., Huang, F., Wang, N., He, L., Zhang, L., Holmdahl,  
588 R., Meng, L., and Lu, S. (2021) Dependence of SARS-CoV-2 infection on cholesterol-rich lipid  
589 raft and endosomal acidification. *Comput Struct Biotechnol J* **19**, 1933-1943
- 590 23. Bayati, A., Kumar, R., Francis, V., and McPherson, P. S. (2021) SARS-CoV-2 infects cells  
591 following viral entry via clathrin-mediated endocytosis. *J Biol Chem* **296**, 100306
- 592 24. Kang, Y. L., Chou, Y. Y., Rothlauf, P. W., Liu, Z., Soh, T. K., Cureton, D., Case, J. B., Chen, R. E.,  
593 Diamond, M. S., Whelan, S. P. J., and Kirchhausen, T. (2020) Inhibition of PIKfyve kinase  
594 prevents infection by Zaire ebolavirus and SARS-CoV-2. *Proc Natl Acad Sci U S A* **117**, 20803-  
595 20813
- 596 25. Crouchet, E., Wrensch, F., Schuster, C., Zeisel, M. B., and Baumert, T. F. (2018) Host-targeting  
597 therapies for hepatitis C virus infection: current developments and future applications.  
598 *Therap Adv Gastroenterol* **11**, 1756284818759483
- 599 26. Chen, C. Z., Xu, M., Pradhan, M., Gorshkov, K., Petersen, J. D., Straus, M. R., Zhu, W., Shinn,  
600 P., Guo, H., Shen, M., Klumpp-Thomas, C., Michael, S. G., Zimmerberg, J., Zheng, W., and  
601 Whittaker, G. R. (2020) Identifying SARS-CoV-2 Entry Inhibitors through Drug Repurposing  
602 Screens of SARS-S and MERS-S Pseudotyped Particles. *ACS Pharmacol Transl Sci* **3**, 1165-1175
- 603 27. Bartosch, B., Dubuisson, J., and Cosset, F. L. (2003) Infectious hepatitis C virus pseudo-  
604 particles containing functional E1-E2 envelope protein complexes. *J Exp Med* **197**, 633-642
- 605 28. Turner, T. H., Alzubi, M. A., and Harrell, J. C. (2020) Identification of synergistic drug  
606 combinations using breast cancer patient-derived xenografts. *Sci Rep* **10**, 1493
- 607 29. Whitt, M. A. (2010) Generation of VSV pseudotypes using recombinant DeltaG-VSV for  
608 studies on virus entry, identification of entry inhibitors, and immune responses to vaccines. *J*  
609 *Viol Methods* **169**, 365-374
- 610 30. Chen, X., Saccon, E., Appelberg, K. S., Mikaeloff, F., Rodriguez, J. E., Vinhas, B. S., Frisan, T.,  
611 Végvári, Á., Mirazimi, A., Neogi, U., and Gupta, S. (2021) Type-I interferon signatures in  
612 SARS-CoV-2 infected Huh7 cells. *Cell Death Discov* **7**, 114
- 613 31. Saccon, E., Chen, X., Mikaeloff, F., Rodriguez, J. E., Szekely, L., Vinhas, B. S., Krishnan, S.,  
614 Byrreddy, S. N., Frisan, T., Végvári, Á., Mirazimi, A., Neogi, U., and Gupta, S. (2021) Cell-  
615 type-resolved quantitative proteomics map of interferon response against SARS-CoV-2.  
616 *iScience* **24**, 102420
- 617 32. Sherman, E. J., and Emmer, B. T. (2021) ACE2 protein expression within isogenic cell lines is  
618 heterogeneous and associated with distinct transcriptomes. *bioRxiv*
- 619 33. Sun, X., Roth, S. L., Bialecki, M. A., and Whittaker, G. R. (2010) Internalization and fusion  
620 mechanism of vesicular stomatitis virus and related rhabdoviruses. *Future Virol* **5**, 85-96
- 621 34. Shah, J. R., Mosier, P. D., Roth, B. L., Kellogg, G. E., and Westkaemper, R. B. (2009) Synthesis,  
622 structure-affinity relationships, and modeling of AMDA analogs at 5-HT2A and H1 receptors:  
623 structural factors contributing to selectivity. *Bioorg Med Chem* **17**, 6496-6504

- 624 35. Yamakawa, Y., Furutani, K., Inanobe, A., Ohno, Y., and Kurachi, Y. (2012) Pharmacophore  
625 modeling for hERG channel facilitation. *Biochem Biophys Res Commun* **418**, 161-166
- 626 36. Chen, C. Z., Shinn, P., Itkin, Z., Eastman, R. T., Bostwick, R., Rasmussen, L., Huang, R., Shen,  
627 M., Hu, X., Wilson, K. M., Brooks, B. M., Guo, H., Zhao, T., Klump-Thomas, C., Simeonov, A.,  
628 Michael, S. G., Lo, D. C., Hall, M. D., and Zheng, W. (2020) Drug Repurposing Screen for  
629 Compounds Inhibiting the Cytopathic Effect of SARS-CoV-2. *Front Pharmacol* **11**, 592737
- 630 37. Plaze, M., Attali, D., Petit, A. C., Blatzer, M., Simon-Loriere, E., Vinckier, F., Cachia, A.,  
631 Chrétien, F., and Gaillard, R. (2020) Repurposing chlorpromazine to treat COVID-19: The  
632 reCoVery study. *Encephale* **46**, 169-172
- 633 38. Plaze, M., Attali, D., Prot, M., Petit, A. C., Blatzer, M., Vinckier, F., Levillayer, L., Chiaravalli, J.,  
634 Perin-Dureau, F., Cachia, A., Friedlander, G., Chrétien, F., Simon-Loriere, E., and Gaillard, R.  
635 (2021) Inhibition of the replication of SARS-CoV-2 in human cells by the FDA-approved drug  
636 chlorpromazine. *Int J Antimicrob Agents* **57**, 106274
- 637 39. Xiong, H. L., Cao, J. L., Shen, C. G., Ma, J., Qiao, X. Y., Shi, T. S., Ge, S. X., Ye, H. M., Zhang, J.,  
638 Yuan, Q., Zhang, T. Y., and Xia, N. S. (2020) Several FDA-Approved Drugs Effectively Inhibit  
639 SARS-CoV-2 Infection in vitro. *Front Pharmacol* **11**, 609592
- 640 40. Carpinteiro, A., Edwards, M. J., Hoffmann, M., Kochs, G., Gripp, B., Weigang, S., Adams, C.,  
641 Carpinteiro, E., Gulbins, A., Keitsch, S., Sehl, C., Soddemann, M., Wilker, B., Kamler, M.,  
642 Bertsch, T., Lang, K. S., Patel, S., Wilson, G. C., Walter, S., Hengel, H., Pöhlmann, S., Lang, P.  
643 A., Kornhuber, J., Becker, K. A., Ahmad, S. A., Fassbender, K., and Gulbins, E. (2020)  
644 Pharmacological Inhibition of Acid Sphingomyelinase Prevents Uptake of SARS-CoV-2 by  
645 Epithelial Cells. *Cell Rep Med* **1**, 100142
- 646 41. Xiao, X., Wang, C., Chang, D., Wang, Y., Dong, X., Jiao, T., Zhao, Z., Ren, L., Dela Cruz, C. S.,  
647 Sharma, L., Lei, X., and Wang, J. (2020) Identification of Potent and Safe Antiviral Therapeutic  
648 Candidates Against SARS-CoV-2. *Front Immunol* **11**, 586572
- 649 42. Moraczewski, J., and Aedma, K. K. (2021) Tricyclic Antidepressants. in *StatPearls*, Treasure  
650 Island (FL). pp
- 651 43. Fallahi-Sichani, M., Honarnejad, S., Heiser, L. M., Gray, J. W., and Sorger, P. K. (2013) Metrics  
652 other than potency reveal systematic variation in responses to cancer drugs. *Nat Chem Biol*  
653 **9**, 708-714
- 654 44. Yeung, P. K., Hubbard, J. W., Korchinski, E. D., and Midha, K. K. (1993) Pharmacokinetics of  
655 chlorpromazine and key metabolites. *Eur J Clin Pharmacol* **45**, 563-569
- 656 45. Tett, S., Day, R., and Cutler, D. (1996) Hydroxychloroquine relative bioavailability: within  
657 subject reproducibility. *Br J Clin Pharmacol* **41**, 244-246
- 658 46. Penmatsa, A., Wang, K. H., and Gouaux, E. (2013) X-ray structure of dopamine transporter  
659 elucidates antidepressant mechanism. *Nature* **503**, 85-90
- 660 47. Shimamura, T., Shiroishi, M., Weyand, S., Tsujimoto, H., Winter, G., Katritch, V., Abagyan, R.,  
661 Cherezov, V., Liu, W., Han, G. W., Kobayashi, T., Stevens, R. C., and Iwata, S. (2011) Structure  
662 of the human histamine H1 receptor complex with doxepin. *Nature* **475**, 65-70
- 663 48. Coleman, J. A., Green, E. M., and Gouaux, E. (2016) X-ray structures and mechanism of the  
664 human serotonin transporter. *Nature* **532**, 334-339
- 665 49. Nys, M., Wijckmans, E., Farinha, A., Yoluk, O., Andersson, M., Brams, M., Spurny, R.,  
666 Peigneur, S., Tytgat, J., Lindahl, E., and Ulens, C. (2016) Allosteric binding site in a Cys-loop  
667 receptor ligand-binding domain unveiled in the crystal structure of ELIC in complex with  
668 chlorpromazine. *Proc Natl Acad Sci U S A* **113**, E6696-E6703
- 669 50. Fu, L., Wang, S., Wang, X., Wang, P., Zheng, Y., Yao, D., Guo, M., Zhang, L., and Ouyang, L.  
670 (2016) Crystal structure-based discovery of a novel synthesized PARP1 inhibitor (OL-1) with  
671 apoptosis-inducing mechanisms in triple-negative breast cancer. *Sci Rep* **6**, 3
- 672 51. Zhao, Y., Ren, J., Fry, E. E., Xiao, J., Townsend, A. R., and Stuart, D. I. (2018) Structures of  
673 Ebola Virus Glycoprotein Complexes with Tricyclic Antidepressant and Antipsychotic Drugs. *J*  
674 *Med Chem* **61**, 4938-4945

- 675 52. Mingo, R. M., Simmons, J. A., Shoemaker, C. J., Nelson, E. A., Schornberg, K. L., D'Souza, R. S.,  
676 Casanova, J. E., and White, J. M. (2015) Ebola virus and severe acute respiratory syndrome  
677 coronavirus display late cell entry kinetics: evidence that transport to NPC1+ endolysosomes  
678 is a rate-defining step. *J Virol* **89**, 2931-2943
- 679 53. Cheng, Q., Shah, N., Broer, A., Fairweather, S., Jiang, Y., Schmoll, D., Corry, B., and Broer, S.  
680 (2017) Identification of novel inhibitors of the amino acid transporter B(0) AT1 (SLC6A19), a  
681 potential target to induce protein restriction and to treat type 2 diabetes. *Br J Pharmacol*  
682 **174**, 468-482
- 683 54. Kleta, R., Romeo, E., Ristic, Z., Ohura, T., Stuart, C., Arcos-Burgos, M., Dave, M. H., Wagner,  
684 C. A., Camargo, S. R., Inoue, S., Matsuura, N., Helip-Wooley, A., Bockenbauer, D., Warth, R.,  
685 Bernardini, I., Visser, G., Eggermann, T., Lee, P., Chairoungdua, A., Jutabha, P., Babu, E.,  
686 Nilwarangkoon, S., Anzai, N., Kanai, Y., Verrey, F., Gahl, W. A., and Koizumi, A. (2004)  
687 Mutations in SLC6A19, encoding B0AT1, cause Hartnup disorder. *Nat Genet* **36**, 999-1002
- 688 55. Wang, H., Goehring, A., Wang, K. H., Penmatsa, A., Ressler, R., and Gouaux, E. (2013)  
689 Structural basis for action by diverse antidepressants on biogenic amine transporters. *Nature*  
690 **503**, 141-145
- 691 56. Yan, R., Zhang, Y., Li, Y., Xia, L., Guo, Y., and Zhou, Q. (2020) Structural basis for the  
692 recognition of SARS-CoV-2 by full-length human ACE2. *Science* **367**, 1444-1448
- 693 57. Gordon, D. E., Hiatt, J., Bouhaddou, M., Rezelj, V. V., Ulferts, S., Braberg, H., Jureka, A. S.,  
694 Obernier, K., Guo, J. Z., Batra, J., Kaake, R. M., Weckstein, A. R., Owens, T. W., Gupta, M.,  
695 Pourmal, S., Titus, E. W., Cakir, M., Soucheray, M., McGregor, M., Cakir, Z., Jang, G.,  
696 O'Meara, M. J., Tummino, T. A., Zhang, Z., Foussard, H., Rojic, A., Zhou, Y., Kuchenov, D.,  
697 Huttenhain, R., Xu, J., Eckhardt, M., Swaney, D. L., Fabius, J. M., Ummadi, M., Tutuncuoglu,  
698 B., Rathore, U., Modak, M., Haas, P., Haas, K. M., Naing, Z. Z. C., Pulido, E. H., Shi, Y., Barrio-  
699 Hernandez, I., Memon, D., Petsalaki, E., Dunham, A., Marrero, M. C., Burke, D., Koh, C.,  
700 Vallet, T., Silvas, J. A., Azumaya, C. M., Billesbolle, C., Brilot, A. F., Campbell, M. G., Diallo, A.,  
701 Dickinson, M. S., Diwanji, D., Herrera, N., Hoppe, N., Kratochvil, H. T., Liu, Y., Merz, G. E.,  
702 Moritz, M., Nguyen, H. C., Nowotny, C., Puchades, C., Rizo, A. N., Schulze-Gahmen, U., Smith,  
703 A. M., Sun, M., Young, I. D., Zhao, J., Asarnow, D., Biel, J., Bowen, A., Braxton, J. R., Chen, J.,  
704 Chio, C. M., Chio, U. S., Deshpande, I., Doan, L., Faust, B., Flores, S., Jin, M., Kim, K., Lam, V.  
705 L., Li, F., Li, J., Li, Y. L., Li, Y., Liu, X., Lo, M., Lopez, K. E., Melo, A. A., Moss, F. R., 3rd, Nguyen,  
706 P., Paulino, J., Pawar, K. I., Peters, J. K., Pospiech, T. H., Jr., Safari, M., Sangwan, S., Schaefer,  
707 K., Thomas, P. V., Thwin, A. C., Trenker, R., Tse, E., Tsui, T. K. M., Wang, F., Whitis, N., Yu, Z.,  
708 Zhang, K., Zhang, Y., Zhou, F., Saltzberg, D., Consortium, Q. S. B., Hodder, A. J., Shun-Shion, A.  
709 S., Williams, D. M., White, K. M., Rosales, R., Kehrer, T., Miorin, L., Moreno, E., Patel, A. H.,  
710 Rihn, S., Khalid, M. M., Vallejo-Gracia, A., Fozouni, P., Simoneau, C. R., Roth, T. L., Wu, D.,  
711 Karim, M. A., Ghousaini, M., Dunham, I., Berardi, F., Weigang, S., Chazal, M., Park, J., Logue,  
712 J., McGrath, M., Weston, S., Haupt, R., Hastie, C. J., Elliott, M., Brown, F., Burness, K. A., Reid,  
713 E., Dorward, M., Johnson, C., Wilkinson, S. G., Geyer, A., Giesel, D. M., Baillie, C., Raggett, S.,  
714 Leech, H., Toth, R., Goodman, N., Keough, K. C., Lind, A. L., Zoonomia, C., Klesh, R. J.,  
715 Hemphill, K. R., Carlson-Stevermer, J., Oki, J., Holden, K., Maures, T., Pollard, K. S., Sali, A.,  
716 Agard, D. A., Cheng, Y., Fraser, J. S., Frost, A., Jura, N., Kortemme, T., Manglik, A.,  
717 Southworth, D. R., Stroud, R. M., Alessi, D. R., Davies, P., Frieman, M. B., Ideker, T., Abate, C.,  
718 Jouvenet, N., Kochs, G., Shoichet, B., Ott, M., Palmarini, M., Shokat, K. M., Garcia-Sastre, A.,  
719 Rassen, J. A., Grosse, R., Rosenberg, O. S., Verba, K. A., Basler, C. F., Vignuzzi, M., Peden, A.  
720 A., Beltrao, P., and Krogan, N. J. (2020) Comparative host-coronavirus protein interaction  
721 networks reveal pan-viral disease mechanisms. *Science* **370**
- 722 58. Stukalov, A., Girault, V., Grass, V., Karayel, O., Bergant, V., Urban, C., Haas, D. A., Huang, Y.,  
723 Oubraham, L., Wang, A., Hamad, M. S., Piras, A., Hansen, F. M., Tanzer, M. C., Paron, I.,  
724 Zinzula, L., Engleitner, T., Reinecke, M., Lavacca, T. M., Ehmann, R., Wolfel, R., Jores, J.,  
725 Kuster, B., Protzer, U., Rad, R., Ziebuhr, J., Thiel, V., Scaturro, P., Mann, M., and Pichlmair, A.

- 726 (2021) Multilevel proteomics reveals host perturbations by SARS-CoV-2 and SARS-CoV.  
727 *Nature*
- 728 59. Vercauteren, D., Vandenbroucke, R. E., Jones, A. T., Rejman, J., Demeester, J., De Smedt, S.  
729 C., Sanders, N. N., and Braeckmans, K. (2010) The use of inhibitors to study endocytic  
730 pathways of gene carriers: optimization and pitfalls. *Mol Ther* **18**, 561-569
- 731 60. Sun, X., Yau, V. K., Briggs, B. J., and Whittaker, G. R. (2005) Role of clathrin-mediated  
732 endocytosis during vesicular stomatitis virus entry into host cells. *Virology* **338**, 53-60
- 733 61. Lin, H. P., Singla, B., Ghoshal, P., Faulkner, J. L., Cherian-Shaw, M., O'Connor, P. M., She, J. X.,  
734 Belin de Chantemele, E. J., and Csányi, G. (2018) Identification of novel macropinocytosis  
735 inhibitors using a rational screen of Food and Drug Administration-approved drugs. *Br J*  
736 *Pharmacol* **175**, 3640-3655
- 737 62. Singh, M., Bansal, V., and Feschotte, C. (2020) A Single-Cell RNA Expression Map of Human  
738 Coronavirus Entry Factors. *Cell Rep* **32**, 108175
- 739 63. Ma, D., Chen, C. B., Jhanji, V., Xu, C., Yuan, X. L., Liang, J. J., Huang, Y., Cen, L. P., and Ng, T. K.  
740 (2020) Expression of SARS-CoV-2 receptor ACE2 and TMPRSS2 in human primary  
741 conjunctival and pterygium cell lines and in mouse cornea. *Eye (Lond)* **34**, 1212-1219
- 742 64. Matsuyama, S., Nao, N., Shirato, K., Kawase, M., Saito, S., Takayama, I., Nagata, N., Sekizuka,  
743 T., Katoh, H., Kato, F., Sakata, M., Tahara, M., Kutsuna, S., Ohmagari, N., Kuroda, M., Suzuki,  
744 T., Kageyama, T., and Takeda, M. (2020) Enhanced isolation of SARS-CoV-2 by TMPRSS2-  
745 expressing cells. *Proc Natl Acad Sci U S A* **117**, 7001-7003
- 746 65. Zecha, J., Lee, C. Y., Bayer, F. P., Meng, C., Grass, V., Zerweck, J., Schnatbaum, K., Michler, T.,  
747 Pichlmair, A., Ludwig, C., and Kuster, B. (2020) Data, Reagents, Assays and Merits of  
748 Proteomics for SARS-CoV-2 Research and Testing. *Mol Cell Proteomics* **19**, 1503-1522
- 749 66. Hutchinson, E. C. (2018) Influenza Virus. *Trends Microbiol* **26**, 809-810
- 750 67. Hawkey, P. M., Bhagani, S., and Gillespie, S. H. (2003) Severe acute respiratory syndrome  
751 (SARS): breath-taking progress. *J Med Microbiol* **52**, 609-613
- 752 68. Gatherer, D. (2014) The 2014 Ebola virus disease outbreak in West Africa. *J Gen Virol* **95**,  
753 1619-1624
- 754 69. Basarab, M., Bowman, C., Aarons, E. J., and Cropley, I. (2016) Zika virus. *Bmj* **352**, i1049
- 755 70. Chan, P. K. (2002) Outbreak of avian influenza A(H5N1) virus infection in Hong Kong in 1997.  
756 *Clin Infect Dis* **34 Suppl 2**, S58-64
- 757 71. Zhang, Y., Gargan, S., Lu, Y., and Stevenson, N. J. (2021) An Overview of Current Knowledge  
758 of Deadly CoVs and Their Interface with Innate Immunity. *Viruses* **13**
- 759 72. Vlasova, A. N., Diaz, A., Dantie, D., Xiu, L., Toh, T. H., Lee, J. S., Saif, L. J., and Gray, G. C.  
760 (2021) Novel Canine Coronavirus Isolated from a Hospitalized Pneumonia Patient, East  
761 Malaysia. *Clin Infect Dis*
- 762 73. Chan, S. W., and Egan, P. A. (2005) Hepatitis C virus envelope proteins regulate CHOP via  
763 induction of the unfolded protein response. *FASEB Journal* **19**, 1510-1512
- 764 74. Chan, S.-W., and Egan, P. A. (2009) Effects of hepatitis C virus envelope glycoprotein  
765 unfolded protein response activation on translation and transcription. *Archives of Virology*  
766 **154**, 1631-1640
- 767 75. Egan, P. A., Sobkowiak, M., and Chan, S. W. (2013) Hepatitis C Virus Envelope Protein E1  
768 Binds PERK and Represses the Unfolded Protein Response. *Open Virol J* **7**, 37-40
- 769 76. MacCallum, P. R., Jack, S. C., Egan, P. A., McDermott, B. T., Elliott, R. M., and Chan, S. W.  
770 (2006) Cap-dependent and hepatitis C virus internal ribosome entry site-mediated  
771 translation are modulated by phosphorylation of eIF2 alpha under oxidative stress. *Journal*  
772 *of General Virology* **87**, 3251-3262
- 773 77. Chan, S. W. (2016) Hydrogen peroxide induces La cytoplasmic shuttling and increases  
774 hepatitis C virus internal ribosome entry site-dependent translation. *J Gen Virol* **97**, 2301-  
775 2315



- 776 78. Mufrih M, Chen B. Y, and W, C. S. (2021) Zika Virus Induces an Atypical Tripartite Unfolded  
777 Protein Response with Sustained Sensor and Transient Effector Activation and a Blunted BiP  
778 Response *mSphere* **6**
- 779 79. ULC, C. c. g. (2019) Molecular Operating Environment (MOE).
- 780 80. Jiang, S., Feher, M., Williams, C., Cole, B., and Shaw, D. E. (2020) AutoPH4: An Automated  
781 Method for Generating Pharmacophore Models from Protein Binding Pockets. *Journal of*  
782 *Chemical Information and Modeling* **60**, 4326-4338
- 783 81. Jones, G., Willett, P., Glen, R. C., Leach, A. R., and Taylor, R. (1997) Development and  
784 validation of a genetic algorithm for flexible docking<sup>11</sup>Edited by F. E. Cohen. *Journal of*  
785 *Molecular Biology* **267**, 727-748
- 786 82. Kim, S., Chen, J., Cheng, T., Gindulyte, A., He, J., He, S., Li, Q., Shoemaker, B. A., Thiessen, P.  
787 A., Yu, B., Zaslavsky, L., Zhang, J., and Bolton, E. E. (2020) PubChem in 2021: new data  
788 content and improved web interfaces. *Nucleic Acids Research* **49**, D1388-D1395
- 789 83. Wang, H., Goehring, A., Wang, K. H., Penmatsa, A., Ressler, R., and Gouaux, E. (2013)  
790 Structural basis for action by diverse antidepressants on biogenic amine transporters. *Nature*  
791 **503**, 141-145
- 792 84. Yan, R., Zhang, Y., Li, Y., Xia, L., Guo, Y., and Zhou, Q. (2020) Structural basis for the  
793 recognition of SARS-CoV-2 by full-length human ACE2. *Science* **367**, 1444-1448
- 794 85. Renner, T. M., Tang, V. A., Burger, D., and Langlois, M. A. (2020) Intact Viral Particle Counts  
795 Measured by Flow Virometry Provide Insight into the Infectivity and Genome Packaging  
796 Efficiency of Moloney Murine Leukemia Virus. *J Virol* **94**

797

## 798 **ACKNOWLEDGEMENTS**

799 We sincerely thank François-Loïc Cosset (Université Claude Bernard Lyon 1) and Gary  
800 Whittaker (Cornell) for the MLV pseudovirus system; Charlie Rice (Rockefeller and Apath  
801 LLC) for the Huh-7 cell line. We also thank colleagues for donating reagents: Ian Roberts,  
802 Adam Pickard and Joan Chang. The following reagents were obtained through BEI  
803 Resources, NIAID, NIH: human embryonic kidney Cells (HEK-293T) expressing human  
804 angiotensin-converting enzyme 2, HEK-293T-hACE2 cell line, NR-52511; human lung  
805 carcinoma cells (A549) expressing human angiotensin-converting enzyme 2 (HA-FLAG),  
806 NR-53522; polyclonal anti-SARS-related coronavirus 2 spike glycoprotein (IgG, Rabbit),  
807 NR-52947; spike glycoprotein (stabilized) from SARS-related coronavirus 2, Wuhan-Hu-1  
808 with C-terminal histidine and Twin-Strep® Tags, recombinant from HEK293 cells, NR-  
809 52724. The following reagent was contributed by David Veessler for distribution through BEI  
810 Resources, NIAID, NIH: vector pcDNA3.1(-) containing the SARS-related coronavirus 2,

811 Wuhan-Hu-1 spike glycoprotein gene, NR-52420. The Cystic Fibrosis Trust (UK) provided  
812 financial support for purchase of the drug libraries (CFTR F508del SRC). TS was supported  
813 by the Punjab Educational Endowment Fund (PEEF).

814

815

## 816 **LEGENDS TO THE FIGURES**

### 817 **Figure 1: SARS-CoV-2 pseudotyped virus in anti-viral drug screening.**

818 Pseudovirus was generated on a mouse leukaemia virus (MLV) backbone using a three-  
819 plasmid system consisting of an expression vector for MLV *gag* and *pol*, a transfer vector  
820 carrying a luciferase reporter gene and an expression vector encoding the SARS-CoV-2 spike  
821 protein. Pseudovirus was used to infect 293T cells stably expressing the human angiotensin-  
822 converting enzyme 2 (ACE2). Pseudovirus entry was mediated by the binding of the spike  
823 protein to the ACE2 which then undergoes receptor-mediated endocytosis to trigger  
824 endosomal fusion to release the luciferase reporter gene into cell cytoplasm. Infectivity was  
825 measured as luciferase read-out. Drugs from two APExBIO libraries were screened for their  
826 ability to inhibit infectivity by measuring the reduction in luciferase activity. Since the spike  
827 protein only mediates virus entry, the pseudovirus system could be used to identify drug hits  
828 that inhibit SARS-CoV-2 entry steps only. Drug cytotoxicity was measured using an XTT  
829 viability assay in non-infected cells. Drug images were obtained from PubChem and  
830 APExBIO.

831

### 832 **Figure 2: Infectivity of pseudoviruses in a range of cell types.**

833 Mouse leukaemia virus pseudotyped with no envelope protein (empty), glycoprotein from  
834 vesicular stomatitis virus (VSV-G) and spike protein (S) from Middle East respiratory

835 syndrome coronavirus (MERS-S), severe acute respiratory syndrome coronavirus (SARS-S)  
836 and SARS-2-S was used to infect a range of cell types, as indicated, in 24-well plates for 72h.  
837 Infectivity was measured as luciferase activity. Data represent the mean of two repeats for  
838 Vero cells and one experimental result for the other cell types.

839

840 **Figure 3: Quantification of ACE2 and spike protein.**

841 (a) Serial ten-fold dilutions of the SARS-CoV-2-S pseudotyped virus were used to infect  
842 293T-ACE2 cells. Luciferase activity was measured at 72h and compared to that of 293T  
843 cells infected with undiluted pseudovirus. (b) Western blot of ACE2 from  $2.5 \times 10^6$  and  
844  $2.5 \times 10^4$  293T cells and 293T-ACE2 cells from early (P4) and late (P16) passages. The  
845 protein bands were quantified against a standard curve of recombinant ACE2. (c) Western  
846 blot of spike protein from 10 $\mu$ l of empty, VSV-G and SARS-CoV-2-S pseudovirus particles.  
847 The protein bands were quantified against a standard curve of recombinant spike protein.  
848 The spike protein in the SARS-CoV-2-S pseudovirus has been cleaved to yield the S1  
849 subunit. The inset shows the same blot at higher contrast for clarity. Low exposure blot was  
850 used in quantification. The recombinant protein is near full-length and has been stabilized  
851 with the removal of the furin-cleavage site and exhibits many glycosylated and degraded  
852 forms. (d) A table summarizing the calculations. After estimating the  $\mu$ g of ACE2/spike  
853 proteins from the standard curve, the number of molecules was calculated by converting  $\mu$ g  
854 into moles multiplied by Avogadro's number. The range reflects data calculated from  $2.5 \times 10^6$   
855 and  $2.5 \times 10^4$  cell loading. The number of spike proteins was adjusted using the assumption  
856 that 76% of the spike protein are not associated with viral particles (they are secreted or  
857 degraded virion associated with extracellular vesicles). Amongst the viral particles, 80% are  
858 empty viral particles (non-infectious, no genome but retain spike) and the rest of the 20%  
859 intact particles had 0.4% infectivity (85).

860

861 **Figure 4: Kite-shaped molecules specifically inhibit coronavirus infection.**

862 Mouse leukaemia virus pseudotyped with glycoprotein from vesicular stomatitis virus (VSV-  
863 G) and spike protein (S) from severe acute respiratory syndrome coronavirus (SARS-S),  
864 SARS-CoV-2 (SARS-2-S) and Middle East respiratory syndrome coronavirus (MERS-S),  
865 was used to infect 293T-ACE2 cells, in a 96-well plate for 48h in the presence of the drug, as  
866 indicated, with 1h pre-treatment. (a) Infectivity was measured as luciferase activity and  
867 expressed as % infectivity versus infected, DMSO solvent control. Data are presented as  
868 mean +/- SD of two repeats. (b) Mean % infectivity was tabulated together with % viability.

869

870 **Figure 5: Dose-response curves of kite-shaped molecules in SARS-CoV-2-S inhibition.**

871 Mouse leukaemia virus pseudotyped with spike protein (S) from severe acute respiratory  
872 syndrome coronavirus-2 was used to infect 293T-ACE2 cells in 96-well plates for 48h in the  
873 presence of serial doses of the drug, as indicated, with 1h pre-treatment. (a) Infectivity was  
874 measured as luciferase activity and expressed as % infectivity to infected, own solvent  
875 control (dimethylsulphoxide, ethanol or water). Viability was measured by XTT assays in un-  
876 infected cells and expressed as % viability to solvent control (dimethylsulphoxide, ethanol or  
877 water). Data are presented as mean +/- SD of two repeats. (b) Summary of IC<sub>50</sub> values.

878

879 **Figure 6: Graphical depiction of pharmacophore model.**

880 a) A three point pharmacophore model based on the kite-shaped molecules. The asenapine  
881 structure is superimposed (ball and stick representation) for comparison. Brown mesh  
882 represents aromatic moieties (Aro) and magenta mesh represents a H-bond donor/cation  
883 group (Cat&Don). Small spheres (cyan) highlight features in asenapine that are not relevant  
884 for the overall pharmacophore. (b) Displays the numbers of true (T) and false (F) positive (P)



885 and negative (N) hits within the datasets that are discriminated by the pharmacophore (see  
886 Methods). Panel (c) summarises the pharmacophore model performance.

887

888 **Figure 7: Kite-shaped molecules inhibit SARS-CoV-2 pseudovirus at entry steps.**

889 Mouse leukaemia virus pseudotyped with spike protein (S) from severe acute respiratory  
890 syndrome coronavirus-2 was used to infect 293T-ACE2 cells in 96-well plates for 48h in a  
891 time-of-addition experiment. (a) Schematic of time-of-addition experiment. Full-time  
892 treatment involved 1h drug pre-treatment and 1h infection in the presence of drug followed  
893 by drug and virus wash-off and addition of fresh drug for the rest of 48h. Entry assay  
894 involved 1h infection in the presence of drug with and without 1h drug pre-treatment. The  
895 drug and virus were washed off and fresh medium was added without drug for the rest of 48h.  
896 Post-entry assay involved no drug pre-treatment and infection in the absence of drug.  
897 Following virus wash-off, drug was added at 1 hour post-infection (hpi) or 2hpi for the rest of  
898 48h. (b) Infectivity was measured as luciferase activity and expressed as % infectivity to  
899 infected, own solvent control (dimethylsulphoxide, ethanol or water) at the same time-point.  
900 Data are presented as mean +/- SD of two repeats.

901

902 **Figure 8: Kite-shaped molecules inhibit SARS-CoV-2 pseudovirus at post-attachment**

903 **steps.** Mouse leukaemia virus pseudotyped with spike protein (S) from severe acute  
904 respiratory syndrome coronavirus-2 was used to infect 293T-ACE2 cells in 96-well plates for  
905 48h in a temperature shift experiment. (a) Schematic of temperature shift experiment. Cells  
906 were pre-cooled for an hour. In the attachment assay, 10 $\mu$ M drug diluted in pre-cooled virus  
907 aliquots were added to infect for an hour on ice. After 1h, drug and virus were washed off  
908 and cells rinsed 3x with cold medium. Fresh, warm medium was added and cells incubated  
909 for the remaining 48h at 37°C. In the penetration assay, pre-cooled virus without drug was

910 added to cells at 4°C. The virus was washed off after 1h and cells rinsed 3x with ice-cold  
911 medium. Drug in warm medium was then added to incubate with cells for 1h at 37°C. The  
912 drug was then washed off with warm PBS (without Mg<sup>2+</sup> and Ca<sup>2+</sup>) and rinsed with warm  
913 medium. Fresh, warm medium was added to continue incubation for the rest of 48h. (b)  
914 Infectivity was measured as luciferase activity and expressed as % infectivity to infected,  
915 own solvent control (dimethylsulphoxide, ethanol or water). Data are presented as mean +/-  
916 SD of four repeats for attachment assays and three repeats for penetration assays. Statistically  
917 significant differences are represented by \* p<0.05, \*\*p<0.01 and \*\*\*p<0.001.  
918

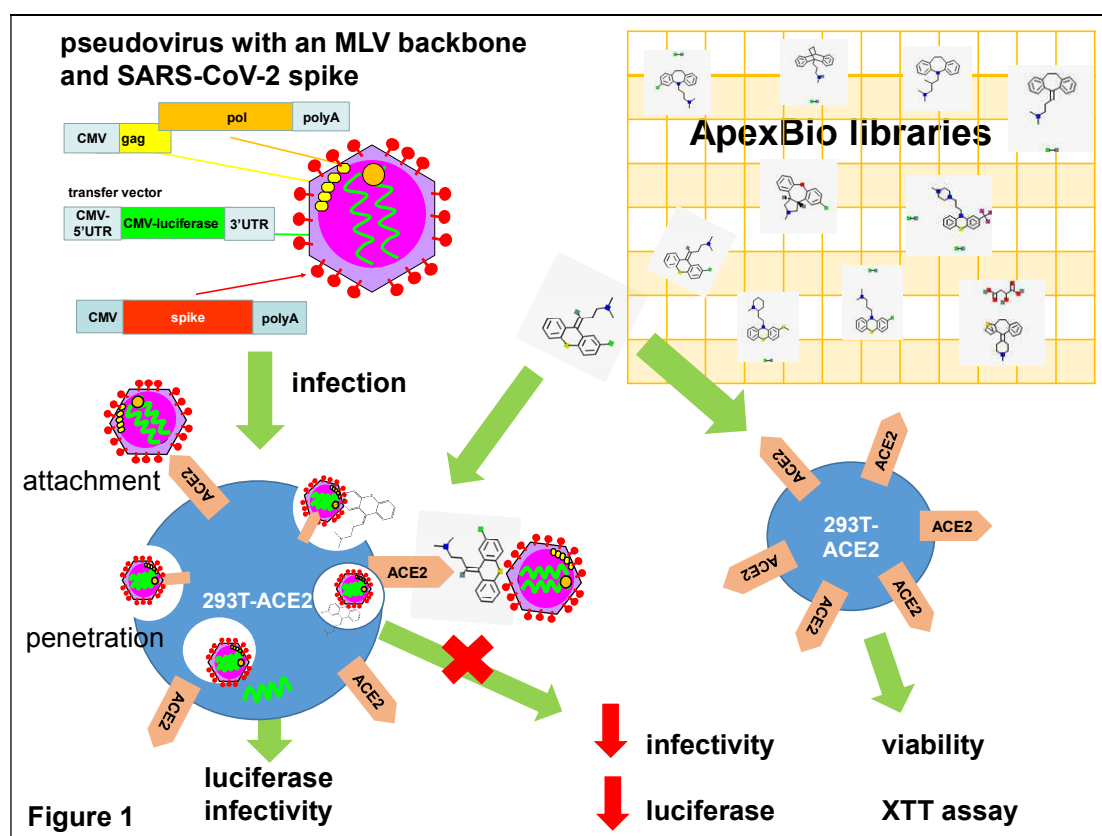

919

920 **Figure 1: SARS-CoV-2 pseudotyped virus in anti-viral drug screening.**

921 Pseudovirus was generated on a mouse leukaemia virus (MLV) backbone using a three-  
922 plasmid system consisting of an expression vector for MLV *gag* and *pol*, a transfer vector  
923 carrying a luciferase reporter gene and an expression vector encoding the SARS-CoV-2 spike  
924 protein. Pseudovirus was used to infect 293T cells stably expressing the human angiotensin-  
925 converting enzyme 2 (ACE2). Pseudovirus entry was mediated by the binding of the spike  
926 protein to the ACE2 which then undergoes receptor-mediated endocytosis to trigger  
927 endosomal fusion to release the luciferase reporter gene into cell cytoplasm. Infectivity was  
928 measured as luciferase read-out. Drugs from two APEX BIO libraries were screened for their  
929 ability to inhibit infectivity by measuring the reduction in luciferase activity. Since the spike  
930 protein only mediates virus entry, the pseudovirus system could be used to identify drug hits  
931 that inhibit SARS-CoV-2 entry steps only. Drug cytotoxicity was measured using an XTT  
932 viability assay in non-infected cells. Drug images were obtained from PubChem and  
933 APEX BIO.

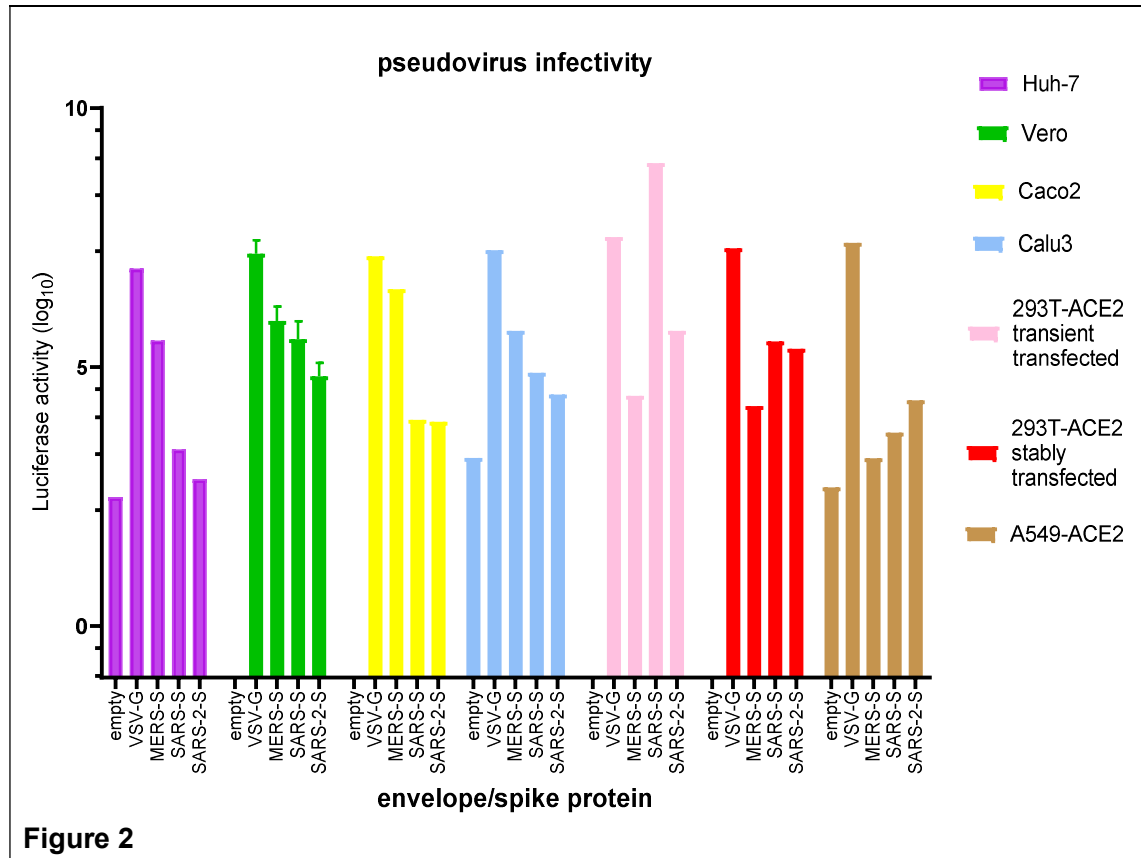

**Figure 2**

934

935 **Figure 2: Infectivity of pseudoviruses in a range of cell types.**

936 Mouse leukaemia virus pseudotyped with no envelope protein (empty), glycoprotein from

937 vesicular stomatitis virus (VSV-G) and spike protein (S) from Middle East respiratory

938 syndrome coronavirus (MERS-S), severe acute respiratory syndrome coronavirus (SARS-S)

939 and SARS-2-S was used to infect a range of cell types, as indicated, in 24-well plates for 72h.

940 Infectivity was measured as luciferase activity. Data represent the mean of two repeats for

941 Vero cells and one experimental result for the other cell types.

942

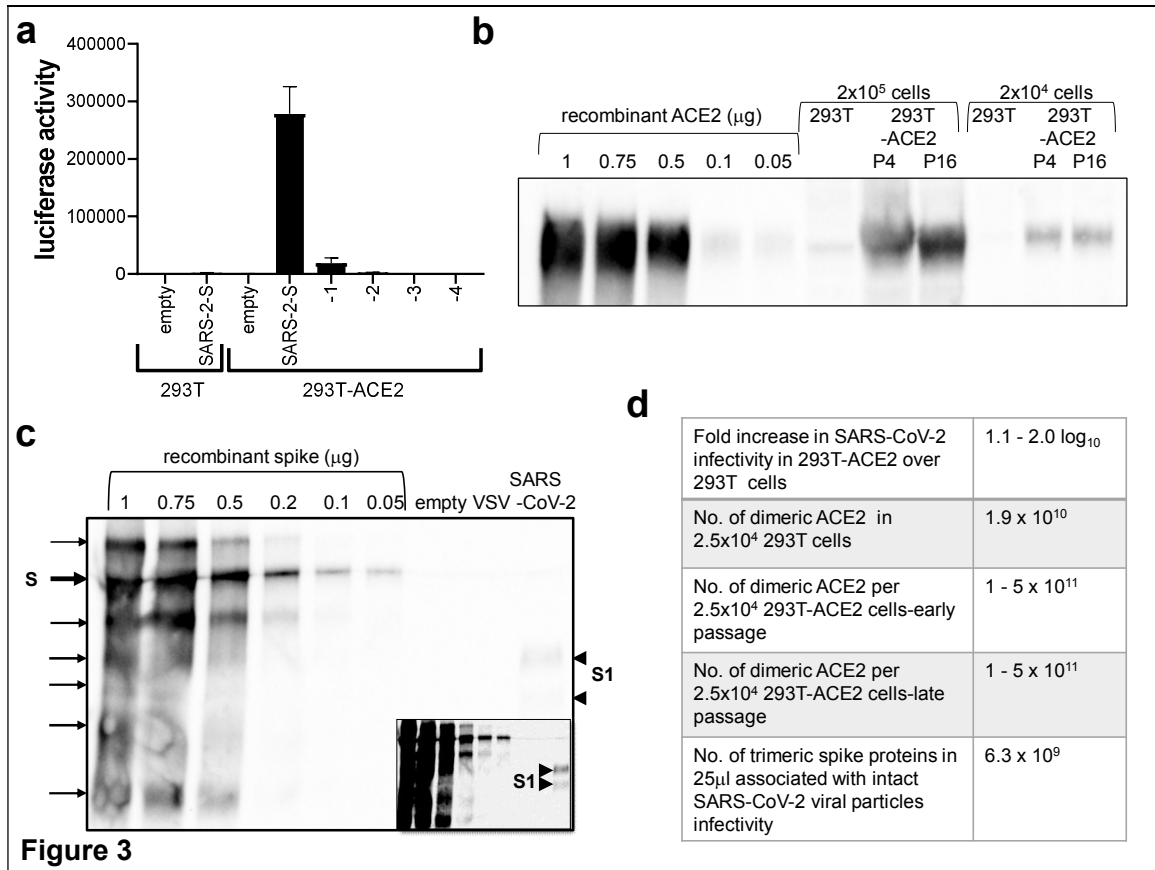

943

**Figure 3**

944 **Figure 3: Quantification of ACE2 and spike protein.**

945 (a) Serial ten-fold dilutions of the SARS-CoV-2-S pseudotyped virus were used to infect

946 293T-ACE2 cells. Luciferase activity was measured at 72h and compared to that of 293T

947 cells infected with undiluted pseudovirus. (b) Western blot of ACE2 from 2.5x10<sup>6</sup> and

948 2.5x10<sup>4</sup> 293T cells and 293T-ACE2 cells from early (P4) and late (P16) passages. The

949 protein bands were quantified against a standard curve of recombinant ACE2. (c) Western

950 blot of spike protein from 10μl of empty, VSV-G and SARS-CoV-2-S pseudovirus particles.

951 The protein bands were quantified against a standard curve of recombinant spike protein.

952 The spike protein in the SARS-CoV-2-S pseudovirus has been cleaved to yield the S1

953 subunit. The inset shows the same blot at higher contrast for clarity. Low exposure blot was

954 used in quantification. The recombinant protein is near full-length and has been stabilized

955 with the removal of the furin-cleavage site and exhibits many glycosylated and degraded

956 forms. (d) A table summarizing the calculations. After estimating the μg of ACE2/spike

957 proteins from the standard curve, the number of molecules was calculated by converting  $\mu\text{g}$   
958 into moles multiplied by Avogadro's number. The range reflects data calculated from  $2.5 \times 10^6$   
959 and  $2.5 \times 10^4$  cell loading. The number of spike proteins was adjusted using the assumption  
960 that 76% of the spike protein are not associated with viral particles (they are secreted or  
961 degraded virion associated with extracellular vesicles). Amongst the viral particles, 80% are  
962 empty viral particles (non-infectious, no genome but retain spike) and the rest of the 20%  
963 intact particles had 0.4% infectivity (85).

964

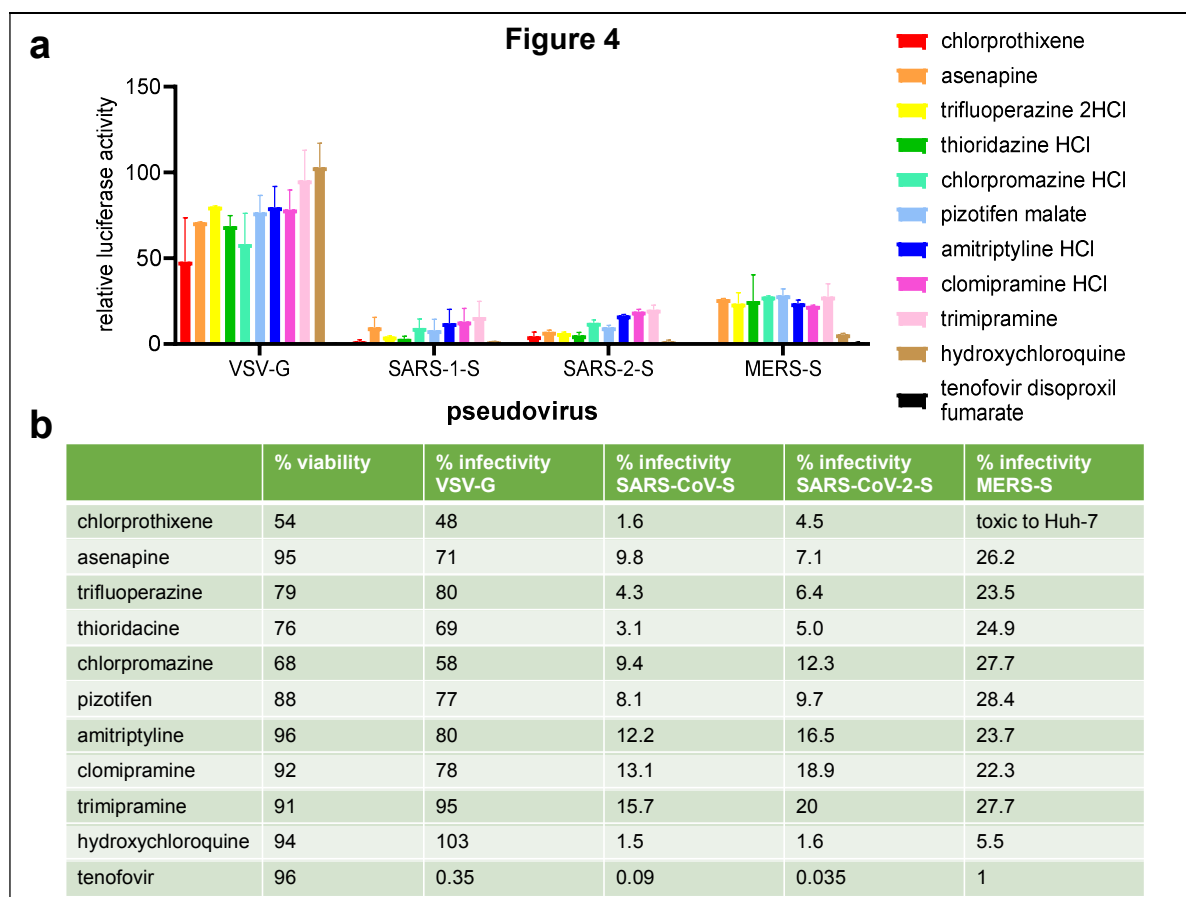

965

966 **Figure 4: Kite-shaped molecules specifically inhibit coronavirus infection.**

967 Mouse leukaemia virus pseudotyped with glycoprotein from vesicular stomatitis virus (VSV-

968 G) and spike protein (S) from severe acute respiratory syndrome coronavirus (SARS-S),

969 SARS-CoV-2 (SARS-2-S) and Middle East respiratory syndrome coronavirus (MERS-S),

970 was used to infect 293T-ACE2 cells, in a 96-well plate for 48h in the presence of the drug, as

971 indicated, with 1h pre-treatment. (a) Infectivity was measured as luciferase activity and

972 expressed as % infectivity versus infected, DMSO solvent control. Data are presented as

973 mean +/- SD of two repeats. (b) Mean % infectivity was tabulated together with % viability.

974

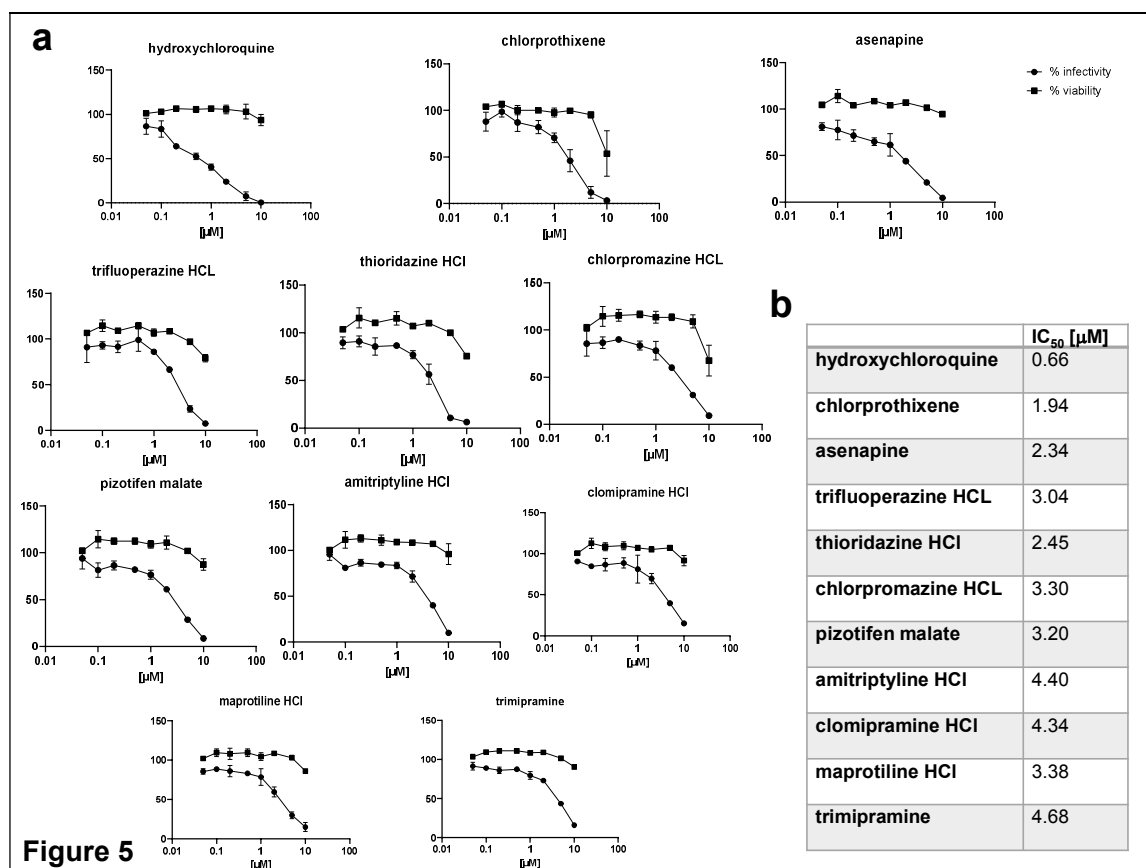

975

976 **Figure 5: Dose-response curves of kite-shaped molecules in SARS-CoV-2-S inhibition.**

977 Mouse leukaemia virus pseudotyped with spike protein (S) from severe acute respiratory  
 978 syndrome coronavirus-2 was used to infect 293T-ACE2 cells in 96-well plates for 48h in the  
 979 presence of serial doses of the drug, as indicated, with 1h pre-treatment. (a) Infectivity was  
 980 measured as luciferase activity and expressed as % infectivity to infected, own solvent  
 981 control (dimethylsulphoxide, ethanol or water). Viability was measured by XTT assays in un-  
 982 infected cells and expressed as % viability to solvent control (dimethylsulphoxide, ethanol or  
 983 water). Data are presented as mean  $\pm$  SD of two repeats. (b) Summary of  $\text{IC}_{50}$  values.

984

985



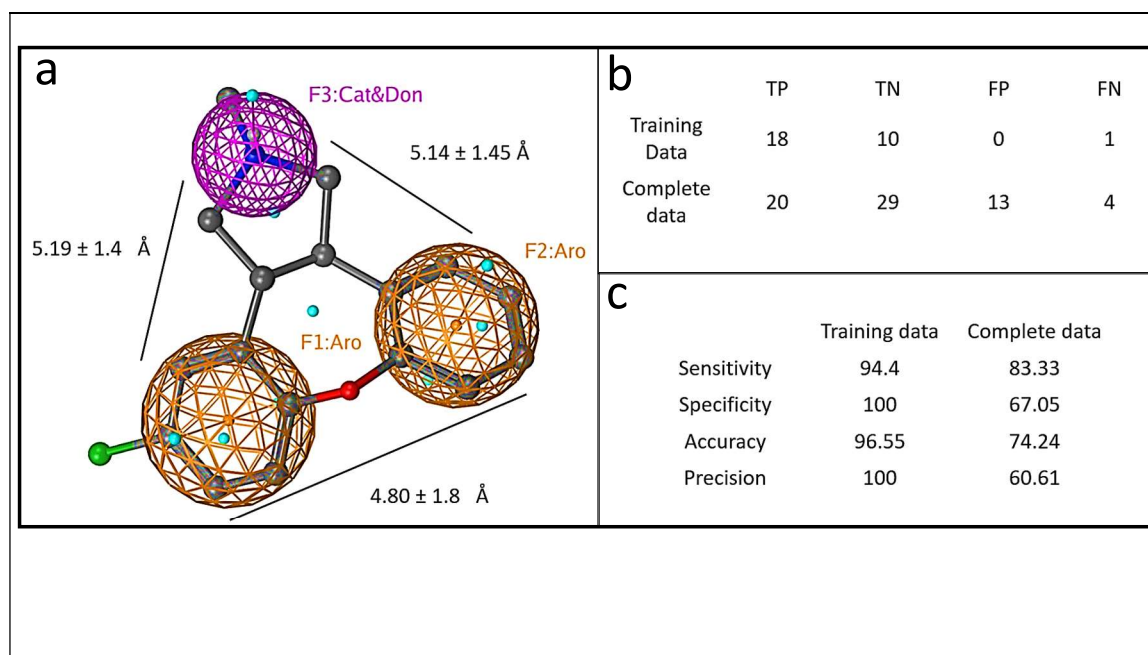

986

987 **Figure 6: Graphical depiction of pharmacophore model.**

988 a) A three point pharmacophore model based on the kite-shaped molecules. The asenapine  
989 structure is superimposed (ball and stick representation) for comparison. Brown mesh  
990 represents aromatic moieties (Aro) and magenta mesh represents a H-bond donor/cation  
991 group (Cat&Don). Small spheres (cyan) highlight features in asenapine that are not relevant  
992 for the overall pharmacophore. (b) Displays the numbers of true (T) and false (F) positive (P)  
993 and negative (N) hits within the datasets that are discriminated by the pharmacophore (see  
994 Methods). Panel (c) summarises the pharmacophore model performance.

995

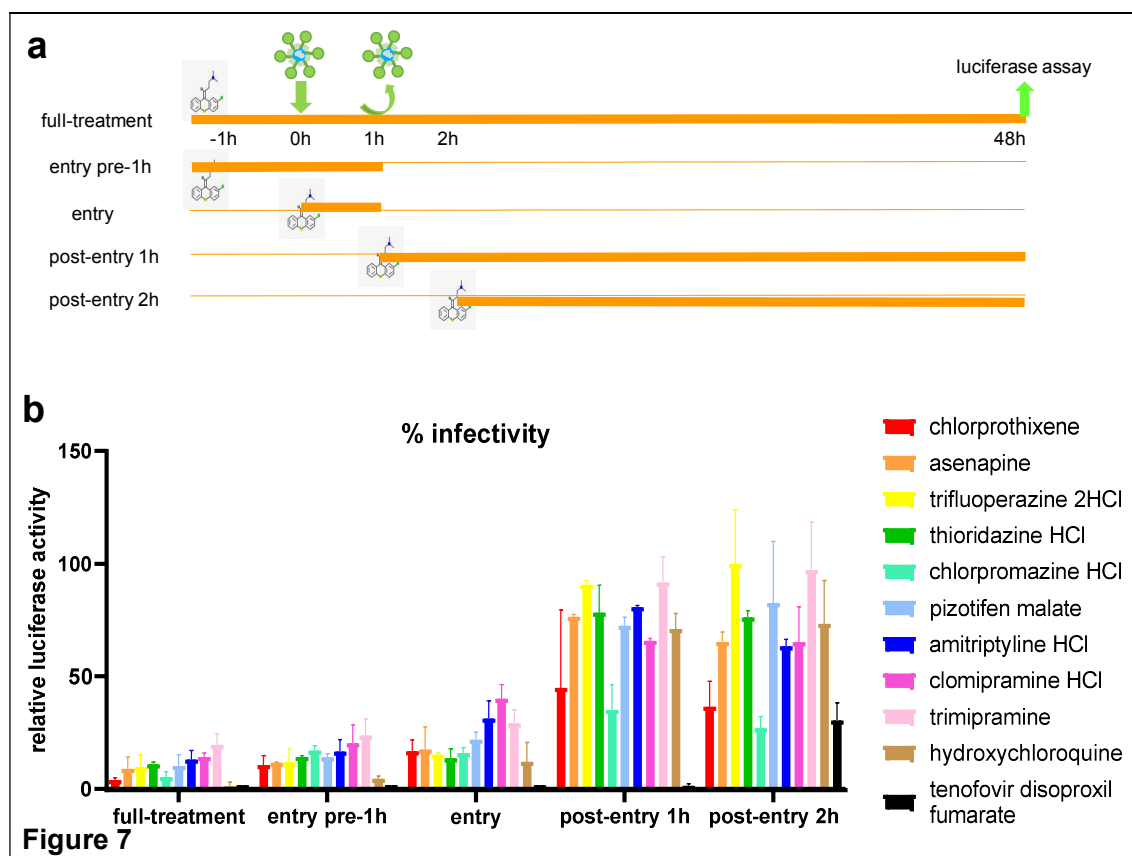

996

997 **Figure 7: Kite-shaped molecules inhibit SARS-CoV-2 pseudovirus at entry steps.**

998 Mouse leukaemia virus pseudotyped with spike protein (S) from severe acute respiratory

999 syndrome coronavirus-2 was used to infect 293T-ACE2 cells in 96-well plates for 48h in a

1000 time-of-addition experiment. (a) Schematic of time-of-addition experiment. Full-time

1001 treatment involved 1h drug pre-treatment and 1h infection in the presence of drug followed

1002 by drug and virus wash-off and addition of fresh drug for the rest of 48h. Entry assay

1003 involved 1h infection in the presence of drug with and without 1h drug pre-treatment. The

1004 drug and virus were washed off and fresh medium was added without drug for the rest of 48h.

1005 Post-entry assay involved no drug pre-treatment and infection in the absence of drug.

1006 Following virus wash-off, drug was added at 1 hour post-infection (hpi) or 2hpi for the rest of

1007 48h. (b) Infectivity was measured as luciferase activity and expressed as % infectivity to

1008 infected, own solvent control (dimethylsulphoxide, ethanol or water) at the same time-point.

1009 Data are presented as mean +/- SD of two repeats.

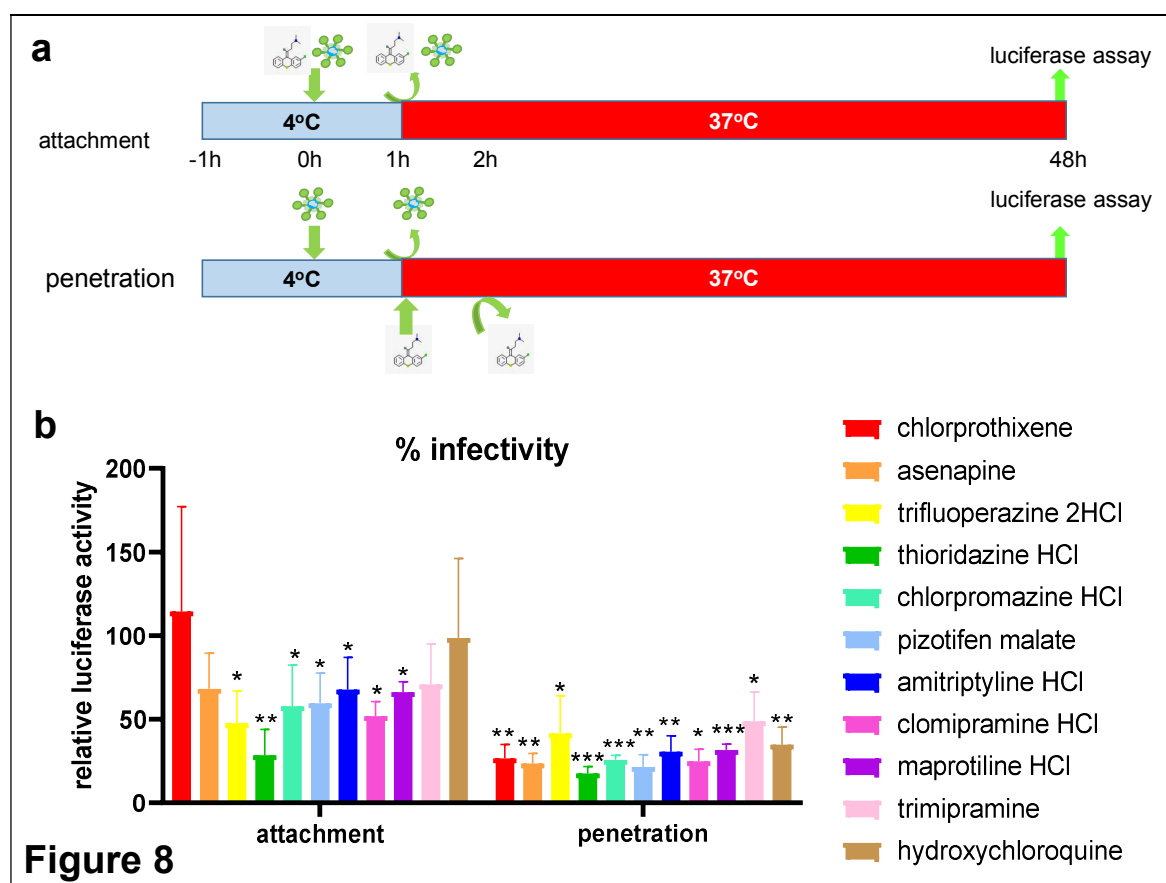

**Figure 8**

1010

1011 **Figure 8: Kite-shaped molecules inhibit SARS-CoV-2 pseudovirus at post-attachment**

1012 **steps.** Mouse leukaemia virus pseudotyped with spike protein (S) from severe acute

1013 respiratory syndrome coronavirus-2 was used to infect 293T-ACE2 cells in 96-well plates for

1014 48h in a temperature shift experiment. (a) Schematic of temperature shift experiment. Cells

1015 were pre-cooled for an hour. In the attachment assay, 10 $\mu$ M drug diluted in pre-cooled virus

1016 aliquots were added to infect for an hour on ice. After 1h, drug and virus were washed off

1017 and cells rinsed 3x with cold medium. Fresh, warm medium was added and cells incubated

1018 for the remaining 48h at 37°C. In the penetration assay, pre-cooled virus without drug was

1019 added to cells at 4°C. The virus was washed off after 1h and cells rinsed 3x with ice-cold

1020 medium. Drug in warm medium was then added to incubate with cells for 1h at 37°C. The

1021 drug was then washed off with warm PBS (without Mg<sup>2+</sup> and Ca<sup>2+</sup>) and rinsed with warm

1022 medium. Fresh, warm medium was added to continue incubation for the rest of 48h. (b)

1023 Infectivity was measured as luciferase activity and expressed as % infectivity to infected,

1024 own solvent control (dimethylsulphoxide, ethanol or water). Data are presented as mean +/-

1025 SD of four repeats for attachment assays and three repeats for penetration assays. Statistically

1026 significant differences are represented by \*  $p < 0.05$ , \*\*  $p < 0.01$  and \*\*\*  $p < 0.001$ .

1027

1028
